# Supplementary material for: VEGF/VEGFR2 signaling regulates hippocampal axon branching during development
Source: eLife. 2019 Dec 23;8:e49818. doi: 10.7554/eLife.49818 (PMC6927742; doi:10.7554/eLife.49818)
Supplement: Figure 3—figure supplement 1—source data 1. [file elife-49818-fig3-figsupp1-data1.xlsx]

## Sheet: Figure 3 FS 1A
Figure 3 - figure supplememt 1 A
RAW DATA	control	VEGF
	0	81.0811
	97.2973	97.2973		Table Analyzed	Primary neurite number (% of control)
	97.2973	113.513
	81.0811	113.513		Column B	VEGF
	97.2973	81.0811		vs.	vs.
	97.2973	64.8649		Column A	control
	113.513	97.2973
	81.0811	81.0811		Unpaired t test
	113.513	113.513		P value	0.5011
	97.2973	81.0811		P value summary	ns
	0	97.2973		Significantly different? (P < 0.05)	No
	113.513	129.73		One- or two-tailed P value?	Two-tailed
	81.0811	97.2973		t, df	t=0.6739 df=220
	97.2973	129.73
	129.73	97.2973		How big is the difference?
	97.2973	97.2973		Mean ± SEM of column A	97.06 ± 2.656, n=102
	97.2973	145.946		Mean ± SEM of column B	99.30 ± 2.068, n=120
	97.2973	97.2973		Difference between means	2.238 ± 3.321
	97.2973	97.2973		95% confidence interval	-4.306 to 8.782
	0	129.73		R squared	0.00206
	129.73	129.73
	81.0811	145.946		F test to compare variances
	97.2973	97.2973		F,DFn, Dfd	1.401, 101, 119
	129.73	113.513		P value	0.0771
	64.8649	97.2973		P value summary	ns
	113.513	129.73		Significantly different? (P < 0.05)	No
	97.2973	129.73
	78.9474	64.8649
	78.9474	64.8649
	94.7368	64.8649
	94.7368	113.513
	78.9474	78.9474
	94.7368	110.526
	110.526	78.9474
	126.316	94.7368
	126.316	94.7368
	110.526	78.9474
	78.9474	78.9474
	110.526	94.7368
	78.9474	94.7368
	110.526	94.7368
	110.526	94.7368
	126.316	94.7368
	110.526	126.316
	142.105	94.7368
	94.7368	110.526
	157.895	94.7368
	142.105	110.526
	110.526	94.7368
	94.7368	63.1579
	94.7368	78.9474
	110.526	126.316
	110.526	157.895
	110.526	142.105
	110.526	94.7368
	94.7368	78.9474
	94.7368	126.316
	94.7368	110.526
	94.7368	142.105
	78.9474	94.7368
	110.526	94.7368
	110.526	110.526
	126.316	126.316
	110.526	78.9474
	63.1579	94.7368
	142.105	78.9474
	94.7368	94.7368
	63.1579	110.526
	63.1579	101.613
	78.9474	130.645
	47.3684	58.0645
	78.9474	130.645
	78.9474	101.613
	110.526	87.0968
	63.1579	58.0645
	87.0968	0
	101.613	87.0968
	87.0968	101.613
	72.5806	130.645
	130.645	116.129
	130.645	87.0968
	116.129	101.613
	101.613	58.0645
	72.5806	58.0645
	99.2126	116.129
	99.2126	101.613
	99.2126	101.613
	85.0394	101.613
	85.0394	101.613
	155.905	101.613
	99.2126	116.129
	99.2126	101.613
	99.2126	101.613
	99.2126	101.613
	85.0394	101.613
	99.2126	87.0968
	70.8661	70.8661
	141.732	113.386
	85.0394	99.2126
	113.386	99.2126
	113.386	99.2126
	70.8661	85.0394
		70.8661
		99.2126
		99.2126
		99.2126
		99.2126
		85.0394
		85.0394
		141.732
		99.2126
		85.0394
		113.386
		127.559
		99.2126
		85.0394
		127.559
		70.8661
		99.2126
		99.2126

## Sheet: Figure 3 FS 1B
Figure 3 - figure supplememt 1 B
RAW DATA	control	VEGF
	157.847	77.0598
	94.2895	90.0118		Table Analyzed	Primary neurite length (% of control)
	127.326	84.8143
	103.007	62.3939		Column B	VEGF
	82.8702	74.7867		vs.	vs.
	85.5101	95.5473		Column A	control
	112.483	104.352
	147.74	103.165		Unpaired t test
	90.4218	116.093		P value	0.214
	85.4314	91.9147		P value summary	ns
	123.937	120.171		Significantly different? (P < 0.05)	No
	111.429	101.68		One- or two-tailed P value?	Two-tailed
	125.524	66.2137		t, df	t=1.246 df=220
	67.5833	83.1819
	73.1772	139.713		How big is the difference?
	64.3042	74.9994		Mean ± SEM of column A	100.0 ± 2.574, n=102
	68.6119	89.1056		Mean ± SEM of column B	104.2 ± 2.188, n=120
	65.8932	105.923		Difference between means	4.182 ± 3.356
	79.7383	103.645		95% confidence interval	-2.432 to 10.80
	104.029	90.0957		R squared	0.00701
	107.684	125.777
	60.3755	110.825		F test to compare variances
	83.7373	88.1961		F,DFn, Dfd	1.177, 101, 119
	102.043	70.0245		P value	0.3926
	122.631	117.695		P value summary	ns
	125.946	94.3162		Significantly different? (P < 0.05)	No
	126.431	114.139
	112.974	83.093
	88.3761	65.4775
	118.956	118.075
	79.614	82.9882
	58.739	50.2527
	75.9961	99.9372
	97.9976	85.0671
	102.739	60.7538
	100.27	70.197
	100.838	86.0075
	69.4721	98.4874
	110.203	96.9592
	58.9122	130.853
	89.9846	108.322
	101.857	92.8254
	106.736	116.982
	92.4923	170.8
	93.9617	100.878
	119.274	129.109
	180.89	153.403
	131.147	114.357
	116.022	84.5185
	129.795	77.8182
	145.586	133.067
	124.446	122.683
	119.803	146.624
	74.4092	132.303
	158.555	81.2075
	78.0337	85.7528
	103.875	113.514
	109.89	70.2754
	115.238	119.568
	134.125	138.063
	77.6222	96.6458
	105.442	150.366
	139.434	182.379
	102.465	131.304
	59.2452	58.2069
	118.314	82.8336
	81.0116	91.8458
	57.3449	145.919
	86.321	100.228
	61.7138	117.213
	123.31	103.774
	74.5268	119.453
	58.8926	78.0174
	112.554	135.691
	40.594	149.129
	91.2692	118.333
	128.598	90.1493
	133.264	132.518
	103.401	124.119
	97.4284	88.6562
	82.1236	108.627
	102.841	114.227
	81.937	98.3617
	79.1373	106.947
	104.171	107.694
	106.952	94.6288
	156.364	86.4164
	100.107	75.9643
	86.631	91.8291
	112.941	100.415
	85.9893	102.281
	65.6685	151.929
	85.1337	105.454
	104.171	70.5516
	84.0642	117.773
	85.9893	96.1219
	76.7914	93.4759
	97.9679	119.358
	141.177	141.39
	109.305	105.454
	102.246	84.492
	94.3315	103.529
		104.171
		127.273
		107.594
		133.476
		118.503
		90.9091
		118.289
		124.064
		77.0054
		93.262
		95.1872
		104.171
		108.235
		111.658
		105.882
		112.941
		82.9946
		96.4706

## Sheet: Figure 3 FS 1C
Figure 3 - figure supplememt 1 C
RAW DATA	control	VEGF
	171.613	88.7508
	88.9371	68.3438		Table Analyzed	Axon length (% of control)
		78.512
	114.639	54.2096		Column B	VEGF
	115.509	47.7877		vs.	vs.
		101.294		Column A	control
	82.1579	118.514
	99.6021	76.6491		Unpaired t test
	93.1317	128.433		P value	0.9273
	166.519	98.4674		P value summary	ns
	87.3181	0		Significantly different? (P < 0.05)	No
	78.3988	106.734		One- or two-tailed P value?	Two-tailed
	139.012	63.3146		t, df	t=0.09130 df=220
	110.679	42.9424
	126.43	114.096		How big is the difference?
	57.3852	83.6523		Mean ± SEM of column A	100.0 ± 3.276, n=102
	57.344	69.5359		Mean ± SEM of column B	100.4 ± 3.065, n=120
	58.298	147.028		Difference between means	0.4101 ± 4.491
	55.7297	76.7114		95% confidence interval	-8.441 to 9.261
	79.4987	90.0543		R squared	3.789e-05
	76.3142	130.667
	70.2772	98.2805		F test to compare variances
	133.691	91.9312		F,DFn, Dfd	1.030, 119, 101
	59.0025	86.8473		P value	0.8824
	87.684	104.919		P value summary	ns
	62.5806	97.0262		Significantly different? (P < 0.05)	No
	133.02	109.711
	125.38	108.147
	169.848	72.7408
	118.49	0
	117.346	91.3162
	150.962	50.3723
	79.9889	73.7172
	67.7863	88.6836
	59.2237	62.8049
	87.4673	67.2982
	70.5752	100.035
	63.0751	139.191
	99.7648	76.9605
	75.9807	139.191
	111.792	151.083
	63.3116	102.839
	99.258	97.6364
	126.353	170.577
	98.481	88.2106
	73.6834	105.204
	72.0955	122.941
	88.7849	127.13
	106.454	93.4472
	145.238	103.109
	104.562	150.644
	162.232	118.988
	166.421	137.84
	135.137	111.724
	105.204	61.217
	62.0616	74.7983
	119.36	77.7037
	77.8388	70.9469
	114.495	124.731
	127.096	130.542
	150.205	95.508
	135.644	180.002
	73.7847	202.672
	84.9335	115.778
	141.252	59.2913
	104.326	94.0553
	76.0145	83.8187
	99.7648	152.671
	91.6566	105.789
	63.5819	158.207
	113.447	152.488
	66.859	136.604
	155.712	74.6559
	85.9808	145.182
	49.8317	0
	122.806	119.449
	33.6829	91.4931
	107.695	116.272
	101.977	106.424
	171.55	77.8327
	132.792	90.2224
	75.9266	94.0346
	64.1723	115.955
	108.33	133.11
	56.8655	71.479
	80.6919	101.977
	124.962	94.67
	115.952	63.2192
	153.558	87.3632
	105.767	99.1175
	97.5408	91.1754
	99.8912	48.6057
	69.728	128.662
	62.6768	60.36
	63.852	123.579
	95.9739	96.8937
	59.9347	72.4701
	69.3362	97.9325
	71.2949	156.3
	71.2949	125.745
	169.619	82.6551
	117.911	105.375
	122.22	96.7574
	128.488	132.797
		103.025
		106.159
		97.5408
		121.436
		157.084
		120.261
		98.3243
		104.2
		84.6137
		108.901
		93.6235
		135.93
		81.0881
		127.704
		78.7378
		125.745

## Sheet: Figure 3 FS 1D
Figure 3 - figure supplememt 1 D
RAW DATA	control	VEGF
	2	1
	1	0		Table Analyzed	Retracting axon branches/neuron
	1	0
	2	1		Column B	VEGF
	2	1		vs.	vs.
	1	0		Column A	control
	1	0
	2	2		Unpaired t test
	1	1		P value	0.481
	2	3		P value summary	ns
	1	1		Significantly different? (P < 0.05)	No
	0	0		One- or two-tailed P value?	Two-tailed
	2	0		t, df	t=0.7082 df=76
	2	1
	1	1		How big is the difference?
	1	1		Mean ± SEM of column A	1.103 ± 0.1150, n=39
	2	2		Mean ± SEM of column B	0.9744 ± 0.1398, n=39
	0	1		Difference between means	-0.1282 ± 0.1810
	2	0		95% confidence interval	-0.4887 to 0.2323
	0	0		R squared	0.006557
	1	0
	2	0		F test to compare variances
	1	1		F,DFn, Dfd	1.479, 38, 38
	1	3		P value	0.2322
	1	0		P value summary	ns
	2	3		Significantly different? (P < 0.05)	No
	1	2
	1	2
	0	1
	0	1
	1	1
	0	1
	1	1
	0	1
	0	1
	1	2
	2	0
	1	1
	1	1

## Sheet: Figure 3 FS 1E
Figure 3 - figure supplememt 1 E
RAW DATA	control	VEGF
	0.0053	0.0014
	0.0014	0		Table Analyzed	Branch retraction rate
	0.0028	0
	0.0076	0.0033		Column B	VEGF
	0.0047	0.0037		vs.	vs.
	0.0058	0		Column A	control
	0.0042	0
	0.0024	0.0092		Unpaired t test
	0.0042	0.0033		P value	0.8569
	0.0065	0.0067		P value summary	ns
	0.0028	0.0029		Significantly different? (P < 0.05)	No
	0	0		One- or two-tailed P value?	Two-tailed
	0.0026	0.0034		t, df	t=0.1810 df=76
	0.0033	0.0039
	0.0056	0.0054		How big is the difference?
	0.0029	0.0053		Mean ± SEM of column A	0.003208 ± 0.0004094, n=39
	0.0049	0.0053		Mean ± SEM of column B	0.003097 ± 0.0004513, n=39
	0	0.0031		Difference between means	-0.0001103 ± 0.0006093
	0.007	0		95% confidence interval	-0.001324 to 0.001103
	0	0		R squared	0.0004307
	0.0015	0
	0.011	0		F test to compare variances
	0.0012	0.0027		F,DFn, Dfd	1.215, 38, 38
	0.0025	0.0063		P value	0.5508
	0.0044	0		P value summary	ns
	0.0036	0.011		Significantly different? (P < 0.05)	No
	0.0017	0.0053
	0.0019	0.0092
	0	0.0024
	0	0.0021
	0.0019	0.0032
	0	0.0031
	0.003
	0.0045	0.0022
	0	0.0031
	0.0009	0.0051
	0.0071	0.0045
	0.0013	0
	0.0046	0.0024
		0.0013
