# Supplementary material for: VEGF/VEGFR2 signaling regulates hippocampal axon branching during development
Source: eLife. 2019 Dec 23;8:e49818. doi: 10.7554/eLife.49818 (PMC6927742; doi:10.7554/eLife.49818)
Supplement: Figure 3—source data 1. [file elife-49818-fig3-data1.xlsx]

## Sheet: Figure 3 B
Figure 3 B
RAW DATA	control	VEGF
	142.105	203.007		Table Analyzed	Branch number (% of control)
	40.6015	182.707
	121.805	81.203		Column B	VEGF
	81.203	81.203		vs.	vs.
	121.805	121.805		Column A	control
	81.203	81.203
	81.203	101.504		Unpaired t test
	81.203	121.805		P value	< 0.0001
	101.504	121.805		P value summary	****
	81.203	81.203		Significantly different? (P < 0.05)	Yes
	40.6015	81.203		One- or two-tailed P value?	Two-tailed
	101.504	182.707		t, df	t=4.161 df=220
	101.504	121.805
	182.707	101.504		How big is the difference?
	182.707	223.308		Mean ± SEM of column A	99.02 ± 6.772, n=102
	142.105	142.105		Mean ± SEM of column B	136.2 ± 5.890, n=120
	121.805	182.707		Difference between means	37.17 ± 8.933
	81.203	121.805		95% confidence interval	19.56 to 54.77
	121.805	142.105		R squared	0.07296
	101.504	203.007
	81.203	203.007		F test to compare variances
	60.9023	162.406		F,DFn, Dfd	1.123, 101, 119
	101.504	101.504		P value	0.5399
	182.707	263.91		P value summary	ns
	60.9023	203.007		Significantly different? (P < 0.05)	No
	20.3008	60.9023
	81.203	203.007
	0	203.007
	53.9326	203.007
	0	162.406
	107.865	142.105
	107.865	215.73
	269.663	215.73
	107.865	323.596
	53.9326	107.865
	53.9326	53.9326
	107.865	53.9326
	107.865	215.73
	161.798	107.865
	431.461	107.865
	161.798	269.663
	161.798	53.9326
	161.798	53.9326
	161.798	0
	0	161.798
	161.798	53.9326
	0	107.865
	161.798	53.9326
	161.798	161.798
	0	269.663
	0	161.798
	0	161.798
	53.9326	107.865
	215.73	107.865
	53.9326	107.865
	269.663	161.798
	53.9326	215.73
	107.865	161.798
	53.9326	161.798
	53.9326	107.865
		269.663
	107.865	107.865
	53.9326	215.73
	0	107.865
	0	107.865
	161.798	107.865
	0	53.9326
	0	269.663
	53.9326	32
	107.865	256
	161.798	160
	53.9326	192
	161.798	160
	107.865	96
	107.865	224
	161.798	160
	96	128
	96	96
	0	128
	96	32
	128	32
	64	160
	160	128
	32	64
	128	128
	105.882	192
	105.882	192
	176.471	96
	35.2941	128
	141.177	32
	211.765	32
	105.882	32
	105.882	128
	105.882	128
	105.882	64
	70.5882	128
	70.5882	176.471
	70.5882	176.471
	35.2941	141.177
	176.471	211.765
	35.2941	141.177
	105.882	211.765
	35.2941	141.177
		141.177
		176.471
		141.177
		70.5882
		247.059
		141.177
		35.2941
		105.882
		176.471
		141.177
		70.5882
		105.882
		105.882
		105.882
		105.882
		35.2941
		35.2941

## Sheet: Figure 3 C
Figure 3 C
RAW DATA	control	VEGF
	83.3246	145.448		Table Analyzed	Branch length (% of control)
	17.962	111.759
	136.195	116.715		Column B	VEGF
	121.937	93.0978		vs.	vs.
	78.1731	75.4601		Column A	control
	85.0172	352.519
	81.7359	81.2196		Unpaired t test
	64.3081	161.576		P value	< 0.0001
	75.8693	157.54		P value summary	****
	75.5789	159.685		Significantly different? (P < 0.05)	Yes
	13.4837	66.1909		One- or two-tailed P value?	Two-tailed
	176.293	249.878		t, df	t=4.240 df=220
	95.6459	92.0951
	89.9455	89.82		How big is the difference?
	127.665	189.383		Mean ± SEM of column A	100.0 ± 6.837, n=102
	135.447	162.236		Mean ± SEM of column B	146.6 ± 8.289, n=120
	80.9388	229.359		Difference between means	46.56 ± 10.98
	107.448	186.884		95% confidence interval	24.91 to 68.20
	114.818	242.923		R squared	0.07553
	104.596	198.563
	74.8012	156.335		F test to compare variances
	101.579	67.9089		F,DFn, Dfd	1.729, 119, 101
	148.447	185.188		P value	0.0049
	163.629	308.495		P value summary	**
	132.765	198.922		Significantly different? (P < 0.05)	Yes
	36.0471	81.0158
	176.352	175.486
	0	0
	90.546	209.605
	0	238.165
	191.542	104.723
	110.62	156.551
	240.748	179.597
	125.149	370.672
	52.7957	41.502
	48.572	32.5038
	132.311	70.0576
	130.841	342.667
	208.52	102.469
	241.483	180.423
	169.864	218.987
	137.82	38.7474
	240.473	58.1212
	133.504	0
	0	245.247
	261.132	78.7803
	0	58.9475
	113.212	97.8786
	154.623	180.515
	0	378.201
	0	74.5567
	0	99.8068
	28.2801	66.5685
	178.404	132.035
	61.8857	114.957
	184.372	170.323
	43.2465	240.197
	74.0976	88.7886
	206.775	175.924
	24.4237	209.622
	104.949	398.676
	24.9747	116.701
	0	278.853
	0	116.885
	205.123	254.797
	0	117.069
	0	33.5138
	27.2701	382.149
	57.1112	29.0323
	180.056	204.608
	14.5991	135.945
	120.65	0
	78.6885	123.502
	192.635	175.115
	208.704	182.028
	76.0369	197.696
	60.3687	177.419
	142.857	126.728
	95.8525	115.668
	161.29	64.5161
	44.2396	64.5161
	200.922	200.461
	22.1198	226.728
	96.3134	112.903
	234.115	171.429
	88.8212	0
	243.984	165.899
	72.9211	126.267
	137.07	155.76
	191.898	40.0922
	75.1142	45.1613
	92.6592	49.3088
	32.8967	158.065
	78.9522	100.922
	76.2108	113.364
	33.445	155.3
	41.1209	229.729
	58.1176	353.092
	145.842	115.687
	37.283	252.757
	113.494	62.5038
	46.0554	372.83
		216.57
		100.335
		184.77
		122.266
		88.8212
		286.75
		134.877
		29.6071
		76.2108
		145.294
		48.7968
		55.9245
		82.7901
		195.187
		59.7624
		64.6969
		44.9589
		52.6348

## Sheet: Figure 3 D
Figure 3 D
RAW DATA	control	VEGF
	3	5		Table Analyzed	Axon branches/neuron
	3	4
	3	2		Column B	VEGF
	3	3		vs.	vs.
	2	3		Column A	control
	3	4
	2	5		Unpaired t test
	1	4		P value	0.0002
	3	4		P value summary	***
	5	3		Significantly different? (P < 0.05)	Yes
	3	3		One- or two-tailed P value?	Two-tailed
	5	4		t, df	t=3.896 df=76
	3	2
	2	3		How big is the difference?
	2	4		Mean ± SEM of column A	2.487 ± 0.1638, n=39
	1	3		Mean ± SEM of column B	3.410 ± 0.1712, n=39
	1	4		Difference between means	0.9231 ± 0.2369
	2	2		95% confidence interval	0.4512 to 1.395
	4	2		R squared	0.1665
	2	3
	2	4		F test to compare variances
	3	2		F,DFn, Dfd	1.093, 38, 38
	3	3		P value	0.7856
	1	4		P value summary	ns
	2	3		Significantly different? (P < 0.05)	No
	2	5
	2	4
	3	4
	3	3
	2	5
	2	2
	2	3
	2	5
	4	2
	4	2
	1	2
	3	3
	2	6
	1	4

## Sheet: Figure 3 E
Figure 3 E
RAW DATA	control	VEGF
	0.017	0.02		Table Analyzed	Net branch growth rate
	0.0061	0.036
	0.012	0.0053		Column B	VEGF
	-0.00069	0.013		vs.	vs.
	0.0071	0.0036		Column A	control
	0.0063	0.014
	0.0014	0.027		Unpaired t test
	0.0046	0.014		P value	< 0.0001
	0.0042	0.0077		P value summary	****
	0.016	0.0041		Significantly different? (P < 0.05)	Yes
	0.0063	0.017		One- or two-tailed P value?	Two-tailed
	0.0097	0.013		t, df	t=4.650 df=76
	0.0038	0.0013
	0.0011	0.009		How big is the difference?
	0.0012	0.015		Mean ± SEM of column A	0.006541 ± 0.0006709, n=39
	0.0098	0.0094		Mean ± SEM of column B	0.01232 ± 0.001045, n=39
	0.0028	0.017		Difference between means	0.005775 ± 0.001242
	0.0097	0.0073		95% confidence interval	0.003301 to 0.008248
	0.0063	0.0089		R squared	0.2215
	0.0094	0.02
	0.0074	0.018		F test to compare variances
	0.01	0.0076		F,DFn, Dfd	2.427, 38, 38
	0.0083	0.0051		P value	0.0075
	0.005	0.0083		P value summary	**
	0.0042	0.018		Significantly different? (P < 0.05)	Yes
	0.0049	0.015
	0.0018	0.0051
	0.0051	0.0097
	0.011	0.0096
	0.0079	0.013
	0.0028	0.011
	0.011	0.0085
	0.0022	0.013
	0.011	0.012
	0.012	0.016
	0.0044	0.011
	0.0066	0.0098
	0.006	0.015
	-0.00063	0.012

## Sheet: Figure 3 G
Figure 3 G
RAW DATA	control	VEGF
	7.0373	4.33064		Table Analyzed	Actin patches in 2' per 10µm
	6.19943	5.05743
	3.57487	2.95315		Column B	VEGF
	2.33582	4.42576		vs.	vs.
	5.79248	0		Column A	control
	4.7378	3.01497
	3.34781	3.43591		Paired t test
	2.78715	6.81304		P value	0.4856
	5.32422	5.76791		P value summary	ns
	3.03447	2.32048		Significantly different? (P < 0.05)	No
	2.62695	2.62695		One- or two-tailed P value?	Two-tailed
				t, df	t=0.7241 df=10
				Number of pairs	11
				How big is the difference?
				Mean of differences	-0.5502
				SD of differences	2.52
				SEM of differences	0.7598
				95% confidence interval	-2.243 to 1.143
				R squared	0.04983
				How effective was the pairing?
				Correlation coefficient (r)	-0.03957
				P value (one tailed)	0.454
				P value summary	ns
				Was the pairing significantly effective?	No

## Sheet: Figure 3 H
Figure 3 H
RAW DATA	filopodia		protrusion
	control	VEGF	control	VEGF		Table Analyzed	% of events - filopodia
	33.3333	41.6667	66.6667	58.3333
	5.55556	46.4286	94.4444	53.5714		Column B	VEGF
	45.4545	40	54.5455	60		vs.	vs.
	72.7273	66.6667	27.2727	33.3333		Column A	control
	34.2857	30.303	65.7143	69.697
	0	26.6667	100	73.3333		Paired t test
	13.9535	26.4706	86.0465	73.5294		P value	0.222
	55.5556	36.8421	44.4444	63.1579		P value summary	ns
	26.8293	25	73.1707	75		Significantly different? (P < 0.05)	No
	39.4737	45.1613	60.5263	54.8387		One- or two-tailed P value?	Two-tailed
	11.7647	22.7273	88.2353	77.2727		t, df	t=1.259 df=21
	16.6667	19.0476	83.3333	80.9524		Number of pairs	22
	7.31707	12.8205	92.6829	87.1795
	22.2222	6.89655	77.7778	93.1034		How big is the difference?
	7.69231	25	92.3077	75		Mean of differences	3.823
	9.375	15.1515	90.625	84.8485		SD of differences	14.25
	20	17.5	80	82.5		SEM of differences	3.038
	6.89655	19.4444	93.1034	80.5555		95% confidence interval	-2.494 to 10.14
	23.2558	33.3333	76.7442	66.6667		R squared	0.07014
	39.3939	16.6667	60.6061	83.3333
	30	30.4348	70	69.5652		How effective was the pairing?
	27.7778	29.4118	72.2222	70.5882		Correlation coefficient (r)	0.6256
						P value (one tailed)	0.0009
						P value summary	***
						Was the pairing significantly effective?	Yes
						Table Analyzed	% of events - protrusion
						Column B	VEGF
						vs.	vs.
						Column A	control
						Paired t test
						P value	0.222
						P value summary	ns
						Significantly different? (P < 0.05)	No
						One- or two-tailed P value?	Two-tailed
						t, df	t=1.259 df=21
						Number of pairs	22
						How big is the difference?
						Mean of differences	-3.823
						SD of differences	14.25
						SEM of differences	3.038
						95% confidence interval	-10.14 to 2.494
						R squared	0.07014
						How effective was the pairing?
						Correlation coefficient (r)	0.6256
						P value (one tailed)	0.0009
						P value summary	***
						Was the pairing significantly effective?	Yes

## Sheet: Figure 3 I
Figure 3 I
RAW DATA	control		VEGF
	0-2µm	>2µm	0-2µm	>2µm
	66.6667	33.3333	50	50		Table Analyzed	Event distribution (% of total events) - 0-2µm
	94.4444	5.55556	75	25
	63.6364	36.3636	76.6667	23.3333		Column C	VEGF
	54.5455	45.4545	44.4444	55.5556		vs.	vs.
	74.2857	25.7143	84.8485	15.1515		Column A	control
	100	0	80	20
	88.3721	11.6279	88.2353	11.7647		Paired t test
	61.1111	38.8889	57.8947	42.1053		P value	0.1522
	80.4878	19.5122	75	25		P value summary	ns
	57.8947	42.1053	61.2903	38.7097		Significantly different? (P < 0.05)	No
	88.2353	11.7647	81.8182	18.1818		One- or two-tailed P value?	Two-tailed
	96.6667	3.33333	97.6191	2.38095		t, df	t=1.486 df=21
	95.1219	4.87805	84.6154	15.3846		Number of pairs	22
	80.5556	19.4444	94.8276	5.17241
	100	0	87.5	12.5		How big is the difference?
	93.75	6.25	87.8788	12.1212		Mean of differences	-3.112
	90	10	90	10		SD of differences	9.824
	93.1034	6.89655	88.8889	11.1111		SEM of differences	2.095
	88.3721	11.6279	77.7778	22.2222		95% confidence interval	-7.468 to 1.244
	81.8182	18.1818	86.1111	13.8889		R squared	0.09511
	76.6667	23.3333	82.6087	17.3913
	72.2222	27.7778	76.4706	23.5294		How effective was the pairing?
						Correlation coefficient (r)	0.7527
						P value (one tailed)	< 0.0001
						P value summary	****
						Was the pairing significantly effective?	Yes
						Table Analyzed	Event distribution (% of total events) - >2µm
						Column D	VEGF
						vs.	vs.
						Column B	control
						Paired t test
						P value	0.1522
						P value summary	ns
						Significantly different? (P < 0.05)	No
						One- or two-tailed P value?	Two-tailed
						t, df	t=1.486 df=21
						Number of pairs	22
						How big is the difference?
						Mean of differences	3.112
						SD of differences	9.824
						SEM of differences	2.095
						95% confidence interval	-1.244 to 7.468
						R squared	0.09511
						How effective was the pairing?
						Correlation coefficient (r)	0.7527
						P value (one tailed)	< 0.0001
						P value summary	****
						Was the pairing significantly effective?	Yes
