# Supplementary material for: VEGF/VEGFR2 signaling regulates hippocampal axon branching during development
Source: eLife. 2019 Dec 23;8:e49818. doi: 10.7554/eLife.49818 (PMC6927742; doi:10.7554/eLife.49818)
Supplement: Figure 4—figure supplement 1—source data 1. [file elife-49818-fig4-figsupp1-data1.xlsx]

## Sheet: Figure 4 FS 1G
Figure 4 - figure supplememt 1G
A	Relative distribution of events (%)
		static		mobil
	unstim + aVEGFR2	73.8		26.2
	VEGF 5' + aVEGFR2	69.7		30.3
B	raw values for chi2 test
			observed receptor movement						observed receptor movement
			static	mobil	sum				static	mobil	sum
	stimulus + aVEGFR2	unstim	45	16	61		stimulus + aVEGFR2	unstim	43.7087	17.2913	61
		VEGF 5'	46	20	66			VEGF 5'	47.2913	18.7087	66		P value
		sum	91	36	127			sum	91	36	127		ch2 test	0.610819	n.s.
C	relative values (same as A)
			observed receptor movement
			static	mobil	sum
	stimulus + aVEGFR2	unstim	73.7705	26.2295	100
		VEGF 5'	69.697	30.303	100
		sum	143.467	56.5325	200

## Sheet: Figure 4 FS 1H
Figure 4 - figure supplememt 1H
A	Total number of events
		static		diverging		converging
	unstim + aVEGFR2	45		9		7
	VEGF 5' + aVEGFR2	46		7		13
B	raw values for chi2 test - diverging
			observed receptor movement						observed receptor movement
			static	mobil	sum				static	mobil	sum
	stimulus + aVEGFR2	unstim	54	9	63		stimulus + aVEGFR2	unstim	54.8049	8.19512	63
		VEGF 5'	53	7	60			VEGF 5'	52.1951	7.80488	60		P value
		sum	107	16	123			sum	107	16	123		ch2 test	0.666026	n.s.
C	raw values for chi2 test - converging
			observed receptor movement						observed receptor movement
			static	mobil	sum				static	mobil	sum
	stimulus + aVEGFR2	unstim	54	7	61		stimulus + aVEGFR2	unstim	51.3937	9.6063	61
		VEGF 5'	53	13	66			VEGF 5'	55.6063	10.3937	66		P value
		sum	107	20	127			sum	107	20	127		ch2 test	0.203791	n.s.
