# Supplementary material for: VEGF/VEGFR2 signaling regulates hippocampal axon branching during development
Source: eLife. 2019 Dec 23;8:e49818. doi: 10.7554/eLife.49818 (PMC6927742; doi:10.7554/eLife.49818)
Supplement: Figure 4—source data 1. [file elife-49818-fig4-data1.xlsx]

## Sheet: Figure 4 C
Figure 4 C
A	Relative distribution of events (%)
		static		mobil
	unstim	78.3		21.7
	VEGF 5'	61.6		38.4
B	raw values for chi2 test
			observed receptor movement						observed receptor movement
			static	mobil	sum				static	mobil	sum
	stimulus	unstim	54	15	69		stimulus	unstim	47.6323	21.3677	69
		VEGF 5'	53	33	86			VEGF 5'	59.3677	26.6323	86		P value
		sum	107	48	155			sum	107	48	155		ch2 test	0.0260239	*
C	relative values (same as A)
			observed receptor movement
			static	mobil	sum
	stimulus	unstim	78.2609	21.7391	100
		VEGF 5'	61.6279	38.3721	100
		sum	139.889	60.1112	200

## Sheet: Figure 4 D
Figure 4 D
A	Total number of events
		static		diverging		converging
	unstim	54		10		5
	VEGF 5'	53		16		17
B	raw values for chi2 test - diverging
			observed receptor movement						observed receptor movement
			static	mobil	sum				static	mobil	sum
	stimulus	unstim	54	10	64		stimulus	unstim	51.4887	12.5113	64
		VEGF 5'	53	16	69			VEGF 5'	55.5113	13.4887	69		P value
		sum	107	26	133			sum	107	26	133		ch2 test	0.271788	n.s.
C	raw values for chi2 test - converging
			observed receptor movement						observed receptor movement
			static	mobil	sum				static	mobil	sum
	stimulus	unstim	54	5	59		stimulus	unstim	48.938	10.062	59
		VEGF 5'	53	17	70			VEGF 5'	58.062	11.938	70		P value
		sum	107	22	129			sum	107	22	129		ch2 test	0.0173764	*

## Sheet: Figure 4 E
Figure 4 E
RAW DATA		5' VEGF
	unstim	GC	axon
	1.57349	0.462565	3.76656		Table Analyzed	Relative fluorescence
	1.22597	2.23726	3.11424
	1.69768	1.33282	3.68545		ANOVA summary
	0.97182	2.21993	4.45545		F	7.21
	0.725375	1.28565	1.94669		P value	0.0011
	0.880366	1.22693	2.95773		P value summary	**
	0.463046	1.4546	2.79779		Are differences among means statistically significant? (P < 0.05)	Yes
	1.35882	0.940052	3.24334		R square	0.106
	0.382182	0.920317	1.33549
	0.923686	1.17254	1.02813		Brown-Forsythe test
	0.797576	2.0752	0.67501		F (DFn, DFd)	8.80 (2, 122)
	1.22923	1.8103	0.767455		P value	0.0003
	1.82482	1.01431	0.427659		P value summary	***
	0.562273	0.576373	0.624624		Significantly different standard deviations? (P < 0.05)	Yes
	0.415723	1.2587	1.77268
	0.666097	0.440504	1.35877		Bartlett's test
	1.06858	2.23841	0.700828		Bartlett's statistic (corrected)	28.3
	0.799402	0.546464	0.734558		P value	< 0.0001
	0.326853	0.775475	0.986906		P value summary	****
	1.91711	1.09336	1.09756		Significantly different standard deviations? (P < 0.05)	Yes
	1.18992	2.19675	1.20016
	1.1238	1.07962	0.296357		ANOVA table	SS	DF	MS	F (DFn, DFd)	P value
	0.859525	1.08545	0.734616		Treatment (between columns)	8.58	2	4.29	F (2, 122) = 7.21	P = 0.0011
	0.694456	2.17424	1.71647		Residual (within columns)	72.7	122	0.596
	1.64318	1.21884	2.52258		Total	81.2	124
	0.741142	1.38808	0.939282
	1.00959	1.87245	2.02647		Data summary
	0.803668	1.73739	0.244508		Number of treatments (columns)	3
	1.12464	2.02419	1.08645		Number of values (total)	125
	0.549	0.816589	1.21625
	1.76697	0.950876	2.10961
	1.07085	0.386078	0.717891
	1.01062	1.74475	0.709879		Number of families	1
	0.687731	1.02296	0.696258		Number of comparisons per family	2
	0.649222	0.988398	3.24814		Alpha	0.05
	0.670945	1.09504	1.54234
	0.411257	2.14694	1.91091		Sidak's multiple comparisons test	Mean Diff.	95% CI of diff.	Significant?	Summary
	1.45692	1.4846	1.65612
	2.14466	2.78172			0 min vs. 5 min GC	-0.458	-0.833 to -0.0824	Yes	*		B	5 min GC
	0.592446	2.47846			0 min vs. 5 min axon	-0.633	-1.03 to -0.239	Yes	***		C	5 min axon
	0.989385	1.83886
		1.51216
		3.58329			Test details	Mean 1	Mean 2	Mean Diff.	SE of diff.	n1	n2	t	DF
		2.03873
		1.10552			0 min vs. 5 min GC	1	1.46	-0.458	0.166	41	46	2.76	122
		1.21855			0 min vs. 5 min axon	1	1.63	-0.633	0.174	41	38	3.64	122

## Sheet: Figure 4 F
Figure 4 F
RAW DATA	PP3	PP3 +VEGF	PP2	PP2 +VEGF
	105.556	131.944	105.556	79.1667		Table Analyzed	Branch number (% of control)
	79.1667	131.944	105.556	79.1667
	105.556	131.944	52.7778	52.7778		Two-way ANOVA	Ordinary
	79.1667	184.722	131.944	105.556		Alpha	0.05
	79.1667	79.1667	105.556	131.944
	105.556	158.333	105.556	131.944		Source of Variation	% of total variation	P value	P value summary	Significant?
	105.556	79.1667	52.7778	52.7778		Interaction	5.536	< 0.0001	****	Yes
	105.556	131.944	79.1667	52.7778		Row Factor	2.495	0.0017	**	Yes
	131.944	105.556	52.7778	79.1667		Column Factor	12.93	< 0.0001	****	Yes
	105.556	131.944	105.556	79.1667
	158.333	79.1667	26.3889	79.1667		ANOVA table	SS	DF	MS	F (DFn, DFd)	P value
	79.1667	79.1667	79.1667	52.7778		Interaction	18407	1	18407	F (1, 327) = 22.19	P < 0.0001
	105.556	79.1667	158.333	52.7778		Row Factor	8296	1	8296	F (1, 327) = 10.00	P = 0.0017
	52.7778	105.556	79.1667	52.7778		Column Factor	42988	1	42988	F (1, 327) = 51.81	P < 0.0001
	105.556	79.1667	52.7778	52.7778		Residual	271305	327	829.7
	105.556	131.944	52.7778	79.1667
	105.556	131.944	52.7778	79.1667		Number of missing values	57
	79.1667	79.1667	79.1667	52.7778
	105.556	181.731	79.1667	79.1667
	80.7692	100.962	79.1667	79.1667		Compare cell means regardless of rows and columns
	121.154	161.538	79.1667	79.1667
	80.7692	100.962	79.1667	100.962		Number of families	1
	121.154	181.731	121.154	80.7692		Number of comparisons per family	6
	80.7692	161.538	100.962	100.962		Alpha	0.05
	60.5769	161.538	121.154	60.5769
	40.3846	60.5769	80.7692	100.962		Tukey's multiple comparisons test	Mean Diff.	95% CI of diff.	Significant?	Summary
	121.154	121.154	121.154	60.5769
	121.154	80.7692	80.7692	100.962		unstim:PP3 vs. unstim:PP2	7.966	-3.267 to 19.20	No	ns
	40.3846	161.538	121.154	60.5769		unstim:PP3 vs. VEGF:PP3	-25.21	-37.13 to -13.28	Yes	****
	60.5769	201.923	121.154	60.5769		unstim:PP3 vs. VEGF:PP2	12.92	2.005 to 23.84	Yes	*
	100.962	141.346	100.962	80.7692		unstim:PP2 vs. VEGF:PP3	-33.17	-45.59 to -20.75	Yes	****
	161.538	121.154	100.962	80.7692		unstim:PP2 vs. VEGF:PP2	4.957	-6.503 to 16.42	No	ns
	100.962	121.154	100.962	60.5769		VEGF:PP3 vs. VEGF:PP2	38.13	25.99 to 50.27	Yes	****
	121.154	121.154	80.7692	121.154
	161.538	80.7692	141.346	80.7692
	141.346	100.962	141.346	80.7692		Test details	Mean 1	Mean 2	Mean Diff.	SE of diff.	N1	N2	q	DF
	80.7692	141.346	60.5769	60.5769
	121.154	121.154	80.7692	80.7692		unstim:PP3 vs. unstim:PP2	100	92.03	7.966	4.35	97	80	2.59	327
	80.7692	92.3077	100.962	100.962		unstim:PP3 vs. VEGF:PP3	100	125.2	-25.21	4.617	97	65	7.721	327
	100.962	115.385	80.7692	161.538		unstim:PP3 vs. VEGF:PP2	100	87.08	12.92	4.228	97	89	4.323	327
	92.3077	92.3077	100.962	121.154		unstim:PP2 vs. VEGF:PP3	92.03	125.2	-33.17	4.81	80	65	9.754	327
	92.3077	69.2308	121.154	60.5769		unstim:PP2 vs. VEGF:PP2	92.03	87.08	4.957	4.438	80	89	1.58	327
	115.385	92.3077	100.962	161.538		VEGF:PP3 vs. VEGF:PP2	125.2	87.08	38.13	4.7	65	89	11.47	327
	115.385	92.3077	141.346	69.2308
	69.2308	115.385	92.3077	69.2308
	46.1538	92.3077	69.2308	69.2308
	115.385	161.538	46.1538	92.3077
	115.385	115.385	46.1538	92.3077
	92.3077	115.385	69.2308	92.3077
	92.3077	92.3077	92.3077	69.2308
	69.2308	92.3077	115.385	92.3077
	115.385	161.538	46.1538	92.3077
	92.3077	115.385	92.3077	69.2308
	138.462	207.692	69.2308	46.1538
	138.462	138.462	46.1538	92.3077
	92.3077	186.667	46.1538	46.1538
	115.385	160	46.1538	46.1538
	138.462	106.667	92.3077	46.1538
	92.3077	160	115.385	92.3077
	69.2308	186.667	69.2308	115.385
	92.3077	160	92.3077	92.3077
	106.667	106.667	133.333	69.2308
	80	133.333	106.667	115.385
	106.667	160	106.667	46.1538
	106.667	160	106.667	92.3077
	106.667		106.667	106.667
	80		106.667	133.333
	80		106.667	133.333
	80		133.333	106.667
	106.667		106.667	106.667
	80		133.333	106.667
	133.333		106.667	80
	106.667		80	106.667
	133.333		106.667	106.667
	80		53.3333	133.333
	133.333		80	106.667
	80		106.667	80
	106.667		133.333	106.667
	160		106.667	80
	80		80	106.667
	106.667			80
	80			106.667
	106.667			80
	80			106.667
	80			106.667
	80			133.333
	160			106.667
	106.667			80
	80			80
	133.333
	106.667
	106.667
	106.667
	80
	80
	80
	80

## Sheet: Figure 4 G
Figure 4 G
RAW DATA	PP3	PP3 +VEGF	PP2	PP2 +VEGF
	119.218	117.72	57.8118	43.4337		Table Analyzed	Branch length (% of control)
	65.0008	91.6601	87.1669	84.7706
	43.7332	106.937	78.7798	74.5862		Two-way ANOVA	Ordinary
	69.1944	116.822	94.6555	104.54		Alpha	0.05
	67.3971	74.8857	78.7798	85.6692
	101.246	148.873	89.8628	88.6647		Source of Variation	% of total variation	P value	P value summary	Significant?
	164.449	45.5305	33.5488	49.4246		Interaction	2.663	0.0016	**	Yes
	65.5999	153.366	30.2538	73.0884		Row Factor	1.141	0.0378	*	Yes
	124.31	87.1669	65.8994	54.5168		Column Factor	11.7	< 0.0001	****	Yes
	77.282	100.946	108.434	32.0511
	162.053	135.393	15.8758	49.125		ANOVA table	SS	DF	MS	F (DFn, DFd)	P value
	201.293	103.941	31.452	33.2493		Interaction	14430	1	14430	F (1, 328) = 10.15	P = 0.0016
	100.347	95.2546	99.1487	51.2218		Row Factor	6185	1	6185	F (1, 328) = 4.349	P = 0.0378
	66.199	98.5496	34.1479	36.8438		Column Factor	63403	1	63403	F (1, 328) = 44.58	P < 0.0001
	69.1944	110.831	28.4566	27.5579		Residual	466465	328	1422
	156.062	125.508	43.4337	59.3095
	93.1578	129.403	24.862	56.6136		Number of missing values	60
	72.4894	89.5633	59.609	26.0602
	81.7752	171.022	80.577	106.937
	94.4292	141.381	84.1715	53.6182		Compare cell means regardless of rows and columns
	110.167	114.626	70.3926	50.9223
	96.2653	116.987	47.9269	82.3632		Number of families	1
	113.315	147.939	158.694	65.3135		Number of comparisons per family	6
	26.7549	156.071	96.2653	82.8878		Alpha	0.05
	89.1831	132.463	98.3637	43.28
	55.346	63.2151	95.2161	61.6413		Tukey's multiple comparisons test	Mean Diff.	95% CI of diff.	Significant?	Summary
	63.2151	146.365	152.136	41.7062
	127.479	87.347	79.7402	110.692		unstim:PP3 vs. unstim:PP2	14.62	-0.05097 to 29.30	No	ns
	68.9858	225.843	98.626	65.8381		unstim:PP3 vs. VEGF:PP3	-22.07	-37.65 to -6.495	Yes	**
	51.1491	158.431	129.053	39.6078		unstim:PP3 vs. VEGF:PP2	19.23	4.969 to 33.49	Yes	**
	95.7407	138.496	159.743	32.001		unstim:PP2 vs. VEGF:PP3	-36.69	-52.96 to -20.43	Yes	****
	141.644	121.184	150.562	69.5104		unstim:PP2 vs. VEGF:PP2	4.606	-10.40 to 19.61	No	ns
	103.347	145.578	91.2815	36.9848		VEGF:PP3 vs. VEGF:PP2	41.3	25.41 to 57.19	Yes	****
	105.971	70.035	89.4454	112.266
	193.055	82.8878	109.905	130.627
	136.398	95.2161	152.923	115.938		Test details	Mean 1	Mean 2	Mean Diff.	SE of diff.	N1	N2	q	DF
	145.841	80.5271	71.3465	100.987
	78.1664	145.316	108.069	124.594		unstim:PP3 vs. unstim:PP2	100	85.38	14.62	5.682	98	80	3.639	328
	72.9203	103.761	99.1506	104.921		unstim:PP3 vs. VEGF:PP3	100	122.1	-22.07	6.032	98	65	5.174	328
	130.627	58.6238	83.937	211.154		unstim:PP3 vs. VEGF:PP2	100	80.77	19.23	5.522	98	89	4.925	328
	102.661	142.294	144.267	80.7894		unstim:PP2 vs. VEGF:PP3	85.38	122.1	-36.69	6.297	80	65	8.241	328
	81.4679	85.8716	153.972	46.69		unstim:PP2 vs. VEGF:PP2	85.38	80.77	4.606	5.81	80	89	1.121	328
	118.624	71.8349	119.873	106.757		VEGF:PP3 vs. VEGF:PP2	122.1	80.77	41.3	6.153	65	89	9.493	328
	127.431	71.8349	126.692	77.3394
	63.0275	72.3853	43.211	78.9908
	78.4404	118.073	37.156	121.651
	131.284	147.523	77.6147	112.844
	96.8807	58.6238	33.3028	105.688
	107.064	73.4862	64.9541	91.9266
	84.4954	138.44	61.6514	65.5046
	89.4495	101.835	77.3394	85.3211
	153.853	146.147	34.9541	78.4404
	62.2018	123.303	118.899	63.578
	132.385	156.055	56.1468	41.0092
	127.982	103.486	35.5046	115.872
	91.1009	137.354	47.3394	42.9358
	112.569	94.7684	46.5138	51.1927
	122.477	119.66	116.422	55.5963
	32.2018	118.76	77.0642	70.1835
	88.8991	200.033	52.0183	138.716
	95.5046	279.507	62.7523	120
	117.861	108.564	138.554	41.5596
	51.8827	238.421	78.2739	116.422
	142.153	256.414	75.5748	68.8073
	153.549	134.355	49.1836	95.5046
	99.5668		102.266	51.5828
	91.4695		95.0683	151.15
	115.462		47.6841	119.06
	71.976		137.954	101.666
	152.049		67.7774	69.2769
	84.8717		117.561	143.052
	95.968		85.1716	64.7784
	73.1756		58.7804	66.2779
	109.763		183.539	68.977
	80.973		65.0783	137.954
	71.0763		82.7724	66.5778
	104.965		110.963	64.1786
	49.1836		149.65	74.975
	180.24		127.757	68.6771
	47.0843		99.2669	96.8677
	130.157			146.351
	72.8757			79.7734
	65.3782			80.973
	60.2799			109.763
	75.8747			72.5758
	102.866			107.664
	125.058			123.559
	83.3722			89.97
	88.7704			85.1716
	123.859
	136.454
	118.76
	131.056
	118.76
	97.1676
	62.3792
	113.662
	100

## Sheet: Figure 4 H
Figure 4 H
RAW DATA	PP3	PP3 +VEGF	PP2	PP2 +VEGF
	3	5	2	3
	3	2	3	3		Table Analyzed	Axon branches/neuron
	4	3	2	1
	2	5	2	3		Two-way ANOVA	Ordinary
	2	3	1	2		Alpha	0.05
	2	2	3	5
	1	3	4	3		Source of Variation	% of total variation	P value	P value summary	Significant?
	1	3	2	1		Interaction	7.013	0.0008	***	Yes
	2	3	3	2		Row Factor	4.179	0.009	**	Yes
	3	3	2	4		Column Factor	6.156	0.0016	**	Yes
	2	2	1	0
	2	3	3	2		ANOVA table	SS	DF	MS	F (DFn, DFd)	P value
	3	3	2	2		Interaction	10.24	1	10.24	F (1, 140) = 11.79	P = 0.0008
	2	3	2	2		Row Factor	6.101	1	6.101	F (1, 140) = 7.024	P = 0.0090
	2	5	2	2		Column Factor	8.988	1	8.988	F (1, 140) = 10.35	P = 0.0016
	2	2	3	1		Residual	121.6	140	0.8686
	3	1	1	1
	2	4	2	4		Number of missing values	12
	3	3	4	1
	2	4	1	2
	2	3	2	3		Compare cell means regardless of rows and columns
	2	2	3	2
	2	3	1	1		Number of families	1
	2	3	3	2		Number of comparisons per family	6
	3	3	2	3		Alpha	0.05
	2	3	2	2
	1	4	3	2		Tukey's multiple comparisons test	Mean Diff.	95% CI of diff.	Significant?	Summary
	1	3	3	2
	2	6	1	3		unstim:PP3 vs. unstim:PP2	-0.0337	-0.5979 to 0.5305	No	ns
	2	5	2	1		unstim:PP3 vs. VEGF:PP3	-0.9462	-1.530 to -0.3627	Yes	***
	2	4	3	1		unstim:PP3 vs. VEGF:PP2	0.0881	-0.4872 to 0.6634	No	ns
	2	1	2	2		unstim:PP2 vs. VEGF:PP3	-0.9125	-1.481 to -0.3439	Yes	***
	3	2	1	1		unstim:PP2 vs. VEGF:PP2	0.1218	-0.4383 to 0.6819	No	ns
	2	2	2	3		VEGF:PP3 vs. VEGF:PP2	1.034	0.4548 to 1.614	Yes	****
	2		2	2
			2	1
			2			Test details	Mean 1	Mean 2	Mean Diff.	SE of diff.	N1	N2	q	DF
			2
			3			unstim:PP3 vs. unstim:PP2	2.171	2.205	-0.0337	0.217	35	39	0.2196	140
						unstim:PP3 vs. VEGF:PP3	2.171	3.118	-0.9462	0.2244	35	34	5.963	140
						unstim:PP3 vs. VEGF:PP2	2.171	2.083	0.0881	0.2212	35	36	0.5631	140
						unstim:PP2 vs. VEGF:PP3	2.205	3.118	-0.9125	0.2187	39	34	5.901	140
						unstim:PP2 vs. VEGF:PP2	2.205	2.083	0.1218	0.2154	39	36	0.7996	140
						VEGF:PP3 vs. VEGF:PP2	3.118	2.083	1.034	0.2229	34	36	6.563	140

## Sheet: Figure 4 I
Figure 4 I
RAW DATA	PP3	PP3 +VEGF	PP2	PP2 +VEGF
	0.014	0.017	0.0033	0.0035
	0.0046	0.0095	0.0086	-0.001		Table Analyzed	Net branch growth rate
	0.0025	0.0085	0.0009	0.00076
	0.00083	0.0067	0.009	0.0035		Two-way ANOVA	Ordinary
	0.0092	0.0099	0.002	0.0016		Alpha	0.05
	0.0058	0.0083	0.0044	0.008
	-0.00049	0.0078	0.01	0.0027		Source of Variation	% of total variation	P value	P value summary	Significant?
	-0.0039	0.0083	0.0091	-0.0063		Interaction	7.097	0.0003	***	Yes
	0.01	0.0097	-0.0018	0.0058		Row Factor	1.837	0.0582	ns	No
	0.005	0.0078	0.0013	0.0057		Column Factor	21.34	< 0.0001	****	Yes
	0.0072	0.0092	-0.0033	-0.0051
	0.0066	0.004	0.0012	-0.0009		ANOVA table	SS	DF	MS	F (DFn, DFd)	P value
	0.012	0.0087	0.0074	0.00035		Interaction	0.0002105	1	0.0002105	F (1, 140) = 14.09	P = 0.0003
	0.006	0.012	0.0066	0.0092		Row Factor	5.447e-05	1	5.447e-05	F (1, 140) = 3.648	P = 0.0582
	0.0083	0.0081	0.001	-0.0028		Column Factor	0.0006328	1	0.0006328	F (1, 140) = 42.38	P < 0.0001
	0.012	0.011	0.0072	0.0019		Residual	0.002091	140	1.493e-05
	0.0037	0.0072	0.00063	0.0055
	0.0034	0.011	0.0071	0.0074		Number of missing values	12
	0.0078	0.011	0.0071	0.0019
	0.011	0.0076	-0.00014	0.004
	0.0017	0.013	0.00014	0.0094		Compare cell means regardless of rows and columns
	0.0038	0.0095	0.0042	0.0069
	0.0058	0.0053	0.0059	-0.0016		Number of families	1
	0.006	0.011	0.0015	-0.0009		Number of comparisons per family	6
	0.0083	0.0097	0.0049	0.0082		Alpha	0.05
	0.0017	0.015	0.0028	0.0033
	0.0028	0.0058	0.011	0.0055		Tukey's multiple comparisons test	Mean Diff.	95% CI of diff.	Significant?	Summary
	0.006	0.0081	0.013	0.0075
	0.0031	0.017	0.0029	0.0058		unstim:PP3 vs. unstim:PP2	0.001777	-0.0005623 to 0.004117	No	ns
	0.012	0.017	0.0038	0.0049		unstim:PP3 vs. VEGF:PP3	-0.003653	-0.006072 to -0.001233	Yes	***
	0.0092	0.013	0.0045	0.005		unstim:PP3 vs. VEGF:PP2	0.002966	0.0005813 to 0.005352	Yes	**
	0.0049	0.0065	0.0012	0.0039		unstim:PP2 vs. VEGF:PP3	-0.00543	-0.007788 to -0.003072	Yes	****
	0.012	0.016	0.00063	0.0029		unstim:PP2 vs. VEGF:PP2	0.001189	-0.001133 to 0.003512	No	ns
	0.0023	0.0059	0.0024	0.0088		VEGF:PP3 vs. VEGF:PP2	0.006619	0.004216 to 0.009022	Yes	****
	0.013		0.0019	0.00097
			0.0058	0.0013
			0.0064			Test details	Mean 1	Mean 2	Mean Diff.	SE of diff.	N1	N2	q	DF
			0.01
			0.0092			unstim:PP3 vs. unstim:PP2	0.006233	0.004455	0.001777	0.0008998	35	39	2.793	140
						unstim:PP3 vs. VEGF:PP3	0.006233	0.009885	-0.003653	0.0009305	35	34	5.551	140
						unstim:PP3 vs. VEGF:PP2	0.006233	0.003266	0.002966	0.0009173	35	36	4.573	140
						unstim:PP2 vs. VEGF:PP3	0.004455	0.009885	-0.00543	0.0009067	39	34	8.469	140
						unstim:PP2 vs. VEGF:PP2	0.004455	0.003266	0.001189	0.0008932	39	36	1.883	140
						VEGF:PP3 vs. VEGF:PP2	0.009885	0.003266	0.006619	0.0009241	34	36	10.13	140
