# Supplementary material for: VEGF/VEGFR2 signaling regulates hippocampal axon branching during development
Source: eLife. 2019 Dec 23;8:e49818. doi: 10.7554/eLife.49818 (PMC6927742; doi:10.7554/eLife.49818)
Supplement: Figure 5—figure supplement 1—source data 1. [file elife-49818-fig5-figsupp1-data1.xlsx]

## Sheet: Figure 5 FS 1C
Figure 5 - figure supplement 1 C
RAW DATA	control	Nes-cre;Vegfr2lox/-
	25.8	26.8
	23.8	24.6		Table Analyzed	NeuN+ neurons/100µm
	21.8	25.6
	21.3	25.7		Column B	Nes-cre;Vegfr2lox/-
	25.7	22.2		vs.	vs.
	24.7	21.1		Column A	control
	20.6	25.3
	23.8	29.4		Unpaired t test
	23.8	25.1		P value	0.0629
	23.4	26.7		P value summary	ns
	23.8	26.9		Significantly different? (P < 0.05)	No
		22.6		One- or two-tailed P value?	Two-tailed
				t, df	t=1.964 df=21
				How big is the difference?
				Mean ± SEM of column A	23.50 ± 0.5052, n=11
				Mean ± SEM of column B	25.17 ± 0.6668, n=12
				Difference between means	1.667 ± 0.8485
				95% confidence interval	-0.09785 to 3.431
				R squared	0.1552
				F test to compare variances
				F,DFn, Dfd	1.900, 11, 10
				P value	0.3216
				P value summary	ns
				Significantly different? (P < 0.05)	No

## Sheet: Figure 5 FS 1E
Figure 5 - figure supplement 1 E
RAW DATA	O			P			R			LM			M			G
	control	Nes-cre;Vegfr2lox/-		control	Nes-cre;Vegfr2lox/-		control	Nes-cre;Vegfr2lox/-		control	Nes-cre;Vegfr2lox/-		control	Nes-cre;Vegfr2lox/-		control	Nes-cre;Vegfr2lox/-
	13.7	11.32		9.3	9.76		20.23	26.63		23.57	23.61		18.52	19.12		14.68	9.56
	11.79	14.48		12.61	11.96		24.33	21.69		23.12	23.4		18.35	18.12		9.8	10.35
	11.32	9.23		12.09	13.04		18.45	22.46		25.83	25.58		19.73	17.3		12.58	12.39
	11.79	8.95		12.61	13.41		24.33	23.55		23.12	25.09		18.35	17.59		9.8	11.42
	Table Analyzed	Relative layer thickness (% total thickness) - O		Table Analyzed	Relative layer thickness (% total thickness) - P		Table Analyzed	Relative layer thickness (% total thickness) - R		Table Analyzed	Relative layer thickness (% total thickness) - LM		Table Analyzed	Relative layer thickness (% total thickness) - M		Table Analyzed	Relative layer thickness (% total thickness) - G
	Column B	control		Column D	control		Column F	control		Column H	control		Column J	control		Column L	control
	vs.	vs.		vs.	vs.		vs.	vs.		vs.	vs.		vs.	vs.		vs.	vs.
	Column A	Nes-cre;Vegfr2lox/-		Column C	Nes-cre;Vegfr2lox/-		Column E	Nes-cre;Vegfr2lox/-		Column G	Nes-cre;Vegfr2lox/-		Column I	Nes-cre;Vegfr2lox/-		Column K	Nes-cre;Vegfr2lox/-
	Unpaired t test			Unpaired t test			Unpaired t test			Unpaired t test			Unpaired t test			Unpaired t test
	P value	0.4351		P value	0.7443		P value	0.3788		P value	0.5676		P value	0.2246		P value	0.5786
	P value summary	ns		P value summary	ns		P value summary	ns		P value summary	ns		P value summary	ns		P value summary	ns
	Significantly different? (P < 0.05)	No		Significantly different? (P < 0.05)	No		Significantly different? (P < 0.05)	No		Significantly different? (P < 0.05)	No		Significantly different? (P < 0.05)	No		Significantly different? (P < 0.05)	No
	One- or two-tailed P value?	Two-tailed		One- or two-tailed P value?	Two-tailed		One- or two-tailed P value?	Two-tailed		One- or two-tailed P value?	Two-tailed		One- or two-tailed P value?	Two-tailed		One- or two-tailed P value?	Two-tailed
	t, df	t=0.8361 df=6		t, df	t=0.3416 df=6		t, df	t=0.9499 df=6		t, df	t=0.6045 df=6		t, df	t=1.354 df=6		t, df	t=0.5870 df=6
	How big is the difference?			How big is the difference?			How big is the difference?			How big is the difference?			How big is the difference?			How big is the difference?
	Mean ± SEM of column A	12.15 ± 0.5284, n=4		Mean ± SEM of column C	11.65 ± 0.7937, n=4		Mean ± SEM of column E	21.84 ± 1.486, n=4		Mean ± SEM of column G	23.91 ± 0.6487, n=4		Mean ± SEM of column I	18.74 ± 0.3333, n=4		Mean ± SEM of column K	11.72 ± 1.186, n=4
	Mean ± SEM of column B	11.00 ± 1.276, n=4		Mean ± SEM of column D	12.04 ± 0.8207, n=4		Mean ± SEM of column F	23.58 ± 1.085, n=4		Mean ± SEM of column H	24.42 ± 0.5394, n=4		Mean ± SEM of column J	18.03 ± 0.4003, n=4		Mean ± SEM of column L	10.93 ± 0.6181, n=4
	Difference between means	-1.155 ± 1.381		Difference between means	0.3900 ± 1.142		Difference between means	1.748 ± 1.840		Difference between means	0.5100 ± 0.8437		Difference between means	-0.7050 ± 0.5208		Difference between means	-0.7850 ± 1.337
	95% confidence interval	-4.535 to 2.225		95% confidence interval	-2.404 to 3.184		95% confidence interval	-2.754 to 6.249		95% confidence interval	-1.554 to 2.574		95% confidence interval	-1.979 to 0.5695		95% confidence interval	-4.057 to 2.487
	R squared	0.1044		R squared	0.01908		R squared	0.1307		R squared	0.05741		R squared	0.2339		R squared	0.05431
	F test to compare variances			F test to compare variances			F test to compare variances			F test to compare variances			F test to compare variances			F test to compare variances
	F,DFn, Dfd	5.834, 3, 3		F,DFn, Dfd	1.069, 3, 3		F,DFn, Dfd	1.874, 3, 3		F,DFn, Dfd	1.447, 3, 3		F,DFn, Dfd	1.443, 3, 3		F,DFn, Dfd	3.680, 3, 3
	P value	0.1815		P value	0.9575		P value	0.6188		P value	0.7689		P value	0.7705		P value	0.3129
	P value summary	ns		P value summary	ns		P value summary	ns		P value summary	ns		P value summary	ns		P value summary	ns
	Significantly different? (P < 0.05)	No		Significantly different? (P < 0.05)	No		Significantly different? (P < 0.05)	No		Significantly different? (P < 0.05)	No		Significantly different? (P < 0.05)	No		Significantly different? (P < 0.05)	No
