# Supplementary material for: VEGF/VEGFR2 signaling regulates hippocampal axon branching during development
Source: eLife. 2019 Dec 23;8:e49818. doi: 10.7554/eLife.49818 (PMC6927742; doi:10.7554/eLife.49818)
Supplement: Figure 5—figure supplement 3—source data 1. [file elife-49818-fig5-figsupp3-data1.xlsx]

## Sheet: Figure 5 FS 3B
Figure 5 - figure supplement 3B
RAW DATA	ctrl	VEGF	𝛼Nrp1	𝛼Nrp1 + VEGF
	142.1	203	101.5	40.6
	40.6	182.7	20.3	81.2		Table Analyzed	branch number (% of control)
	121.8	81.2	81.2	223.3
	81.2	81.2	81.2	182.7		Two-way ANOVA	Ordinary
	121.8	121.8	60.9	223.3		Alpha	0.05
	81.2	81.2	40.6	81.2
	81.2	101.5	0	182.7		Source of Variation	% of total variation	P value	P value summary	Significant?
	81.2	121.8	60.9	182.7		Interaction	0.05293	0.6444	ns	No
	101.5	121.8	40.6	81.2		Row Factor	7.148	< 0.0001	****	Yes
	81.2	81.2	182.7	60.9		Column Factor	0.006943	0.8672	ns	No
	40.6	81.2	142.1	121.8
	101.5	182.7	81.2	142.1		ANOVA table	SS	DF	MS	F (DFn, DFd)	P value
	101.5	121.8	162.4	203		Interaction	767.1	1	767.1	F (1, 372) = 0.2134	P = 0.6444
	182.7	101.5	182.7	223.3		Row Factor	103590	1	103590	F (1, 372) = 28.82	P < 0.0001
	182.7	223.3	142.1	142.1		Column Factor	100.6	1	100.6	F (1, 372) = 0.02799	P = 0.8672
	142.1	142.1	101.5	121.8		Residual	1337000	372	3595
	121.8	182.7	101.5	101.5
	81.2	121.8	60.9	182.7		Number of missing values	168
	121.8	142.1	60.9	142.1
	101.5	203	81.2	142.1
	81.2	203	182.7	101.5		Compare cell means regardless of rows and columns
	60.9	162.4	162.4	101.5
	101.5	101.5	162.4	81.2		Number of families	1
	182.7	263.9	142.1	121.8		Number of comparisons per family	6
	60.9	203	40.6	182.7		Alpha	0.05
	20.3	60.9	81.2	182.7
	81.2	203	60.9	182.7		Tukey's multiple comparisons test	Mean Diff.	95% CI of diff.	Significant?	Summary	Adjusted P Value
	0	203	40.6	142.1
	53.9	162.4	101.5	162.4		unstim:Ctrl vs. unstim:𝛼Nrp1	1.95	-21.95 to 25.85	No	ns	0.9967
	0	142.1	81.2	162.4		unstim:Ctrl vs. VEGF:Ctrl	-32.48	-51.94 to -13.01	Yes	***	0.0001
	107.9	215.7	40.6	121.8		unstim:Ctrl vs. VEGF:𝛼Nrp1	-36.64	-61.60 to -11.68	Yes	**	0.001
	107.9	215.7	142.1	243.6		unstim:𝛼Nrp1 vs. VEGF:Ctrl	-34.43	-57.76 to -11.10	Yes	***	0.0009
	269.7	323.6	81.2	64		unstim:𝛼Nrp1 vs. VEGF:𝛼Nrp1	-38.59	-66.67 to -10.52	Yes	**	0.0025
	107.9	107.9	101.5	96		VEGF:Ctrl vs. VEGF:𝛼Nrp1	-4.165	-28.58 to 20.25	No	ns	0.9714
	53.9	53.9		128
	53.9	53.9	224	128
	107.9	215.7	192	128		Test details	Mean 1	Mean 2	Mean Diff.	SE of diff.	N1	N2	q	DF
	107.9	107.9	128	32
	161.8	107.9	192	96		unstim:Ctrl vs. unstim:𝛼Nrp1	100	98.05	1.95	9.261	118	65	0.2978	372
	431.5	269.7	224	192		unstim:Ctrl vs. VEGF:Ctrl	100	132.5	-32.48	7.543	118	136	6.089	372
	161.8	53.9	128	96		unstim:Ctrl vs. VEGF:𝛼Nrp1	100	136.6	-36.64	9.671	118	57	5.358	372
	161.8	53.9	64	192		unstim:𝛼Nrp1 vs. VEGF:Ctrl	98.05	132.5	-34.43	9.041	65	136	5.385	372
	161.8	0	0	160		unstim:𝛼Nrp1 vs. VEGF:𝛼Nrp1	98.05	136.6	-38.59	10.88	65	57	5.016	372
	161.8	161.8	64	128		VEGF:Ctrl vs. VEGF:𝛼Nrp1	132.5	136.6	-4.165	9.46	136	57	0.6227	372
	0	53.9	192	102
	161.8	107.9	32	68
	0	53.9	128	102
	161.8	161.8	96	136
	161.8	269.7	96	136
	0	161.8	32	102
	0	161.8	128	170
	0	107.9	0	170
	53.9	107.9	192	136
	215.7	107.9	68	170
	53.9	161.8	68	204
	269.7	215.7	68	136
	53.9	161.8	68	68
	107.9	161.8	34
	53.9	107.9	136
	53.9	269.7	102
	107.9	107.9	68
	53.9	215.7	102
	0	107.9	68
	0	107.9	68
	161.8	107.9	136
	0	53.9	68
	0	269.7
	53.9	32
	107.9	256
	161.8	160
	53.9	160
	161.8	96
	107.9	224
	107.9	160
	161.8	128
	96	96
	96	128
	96	32
	128	32
	64	160
	160	128
	32	64
	128	128
	105.9	192
	105.9	96
	176.5	128
	35.3	32
	141.2	32
	211.8	32
	105.9	128
	105.9	128
	105.9	64
	105.9	128
	70.6	176.5
	70.6	176.5
	70.6	141.2
	35.3	211.8
	176.5	141.2
	35.3	211.8
	105.9	141.2
	35.3	141.2
	68	176.5
	102	141.2
	102	70.6
	68	247.1
	102	141.2
	102	35.3
	102	105.9
	102	176.5
	136	141.2
	102	70.6
	102	105.9
	102	105.9
	102	105.9
	68	105.9
	102	35.3
	102	35.3
	136	68
		136
		136
		136
		238
		102
		68
		204
		34
		102
		136
		102
		102
		68
		68
		170
		102
		170
		119

## Sheet: Figure 5 FS 3 C
Figure 5 - figure supplement 3C
RAW DATA	ctrl	VEGF	𝛼Nrp1	𝛼Nrp1 + VEGF
	83.3	145.4	55.1	60.9
	18	111.8	21.2	45.1		Table Analyzed	Branch length (% of control)
	136.2	116.7	54.7	225.9
	121.9	93.1	43.6	154		Two-way ANOVA	Ordinary
	78.2	75.5	95.9	253.7		Alpha	0.05
	85	352.5	47.6	46.4
	81.7	81.2	0	227		Source of Variation	% of total variation	P value	P value summary	Significant?
	64.3	161.6	19.3	131.7		Interaction	0.06502	0.6035	ns	No
	75.9	157.5	22.8	58.2		Row Factor	9.417	< 0.0001	****	Yes
	75.6	159.7	205.7	28.5		Column Factor	0.2221	0.3372	ns	No
	13.5	66.2	138.3	146.8
	176.3	249.9	104.6	162		ANOVA table	SS	DF	MS	F (DFn, DFd)	P value
	95.6	92.1	356.1	315.1		Interaction	1600	1	1600	F (1, 373) = 0.2703	P = 0.6035
	89.9	89.8	183.7	364.9		Row Factor	231707	1	231707	F (1, 373) = 39.15	P < 0.0001
	127.7	189.4	171.5	208.9		Column Factor	5465	1	5465	F (1, 373) = 0.9234	P = 0.3372
	135.4	162.2	112.1	172.6		Residual	2208000	373	5919
	80.9	229.4	61.8	110.5
	107.4	186.9	53.9	191.1		Number of missing values	167
	114.8	242.9	82.5	236.3
	104.6	198.6	82.2	176.5		Compare cell means regardless of rows and columns
	74.8	156.3	151.6	89.5
	101.6	67.9	159.2	66.2		Number of families	1
	148.4	185.2	116.8	339.4		Number of comparisons per family	6
	163.6	308.5	154.8	195.6		Alpha	0.05
	132.8	198.9	36.5	251.3
	36	81	68.4	125		Tukey's multiple comparisons test	Mean Diff.	95% CI of diff.	Significant?	Summary	Adjusted P Value
	176.4	175.5	47.7	202.2
	0	209.6	18.1	130.1		unstim:Ctrl vs. unstim:𝛼Nrp1	-3.744	-34.36 to 26.88	No	ns	0.9891
	90.5	238.2	91.1	124.1		unstim:Ctrl vs. VEGF:Ctrl	-48.69	-73.61 to -23.77	Yes	****	< 0.0001
	0	104.7	55.7	166		unstim:Ctrl vs. VEGF:𝛼Nrp1	-61.26	-93.24 to -29.28	Yes	****	< 0.0001
	191.5	156.6	18.8	90.1		unstim:𝛼Nrp1 vs. VEGF:Ctrl	-44.95	-74.89 to -15.01	Yes	***	0.0007
	110.6	179.6	213.2	189.2		unstim:𝛼Nrp1 vs. VEGF:𝛼Nrp1	-57.52	-93.54 to -21.49	Yes	***	0.0003
	240.7	370.7	67.6	105.5		VEGF:Ctrl vs. VEGF:𝛼Nrp1	-12.57	-43.90 to 18.76	No	ns	0.7288
	125.1	41.5	109.5	92.2
	52.8	32.5	233.2	118.9
	48.6	70.1	343.8	96.8		Test details	Mean 1	Mean 2	Mean Diff.	SE of diff.	N1	N2	q	DF
	132.3	342.7	105.1	206.5
	130.8	102.5	206	83.9		unstim:Ctrl vs. unstim:𝛼Nrp1	99.99	103.7	-3.744	11.87	119	65	0.4462	373
	208.5	180.4	221.7	122.6		unstim:Ctrl vs. VEGF:Ctrl	99.99	148.7	-48.69	9.657	119	136	7.131	373
	241.5	219	87.1	209.7		unstim:Ctrl vs. VEGF:𝛼Nrp1	99.99	161.3	-61.26	12.39	119	57	6.991	373
	169.9	38.7	114.3	139.6		unstim:𝛼Nrp1 vs. VEGF:Ctrl	103.7	148.7	-44.95	11.6	65	136	5.48	373
	137.8	58.1	0	365.9		unstim:𝛼Nrp1 vs. VEGF:𝛼Nrp1	103.7	161.3	-57.52	13.96	65	57	5.827	373
	240.5	0	65.9	336.4		VEGF:Ctrl vs. VEGF:𝛼Nrp1	148.7	161.3	-12.57	12.14	136	57	1.464	373
	133.5	245.2	281.1	141
	0	78.8	28.1	121.3
	261.1	58.9	153.5	98.4
	0	97.9	80.2	90.6
	113.2	180.5	40.6	162.2
	154.6	378.2	17.1	168.3
	0	74.6	128.6	142.6
	0	99.8	0	163.8
	0	66.6	220.7	128.1
	28.3	132	101.2	146.5
	178.4	115	76.1	178.9
	61.9	170.3	104.6	170.6
	184.4	240.2	65.4	220.9
	43.2	88.8	53.7	95.6
	74.1	175.9	136.4
	206.8	209.6	146.5
	24.4	398.7	97.9
	104.9	116.7	77.7
	25	278.9	101.2
	0	116.9	40.8
	0	254.8	141.5
	205.1	117.1	51.4
	0	33.5
	0	382.1
	27.3	29
	57.1	204.6
	180.1	135.9
	14.6	123.5
	120.6	175.1
	78.7	182
	192.6	197.7
	208.7	177.4
	76	126.7
	60.4	115.7
	142.9	64.5
	95.9	64.5
	161.3	200.5
	44.2	226.7
	200.9	112.9
	22.1	171.4
	96.3	165.9
	234.1	126.3
	88.8	155.8
	244	40.1
	72.9	45.2
	137.1	49.3
	191.9	158.1
	75.1	100.9
	92.7	113.4
	32.9	155.3
	79	229.7
	76.2	353.1
	33.4	115.7
	41.1	252.8
	58.1	62.5
	145.8	372.8
	37.3	216.6
	113.5	100.3
	46.1	184.8
	44.7	122.3
	183.4	88.8
	92.8	286.7
	86.1	134.9
	54.2	29.6
	116.3	76.2
	123	145.3
	89.5	48.8
	156.6	55.9
	73.8	82.8
	67.7	195.2
	111.3	59.8
	102.9	64.7
	74.9	45
	127.5	52.6
	61	76.6
	134.2	109.6
		117.4
		210.3
		267.9
		141.5
		96.7
		235.4
		109.6
		214.2
		135.9
		91.2
		146.5
		104
		71.6
		103.5
		135.9
		128.1
		138.7

## Sheet: Figure 5 FS 3D
Figure 5 - figure supplement 3D
RAW DATA	ctrl	𝛼VEGFR2	𝛼VEGFR2 + 𝛼Nrp1
	123.077	153.846	123.077		Table Analyzed	Branch number (% of control)
	107.692	76.9231	92.3077
	107.692	92.3077	92.3077		ANOVA summary
	92.3077	153.846	153.846		F	6.22
	123.077	107.692	76.9231		P value	0.0024
	92.3077	138.462	123.077		P value summary	**
	92.3077	92.3077	123.077		Are differences among means statistically significant? (P < 0.05)	Yes
	76.9231	92.3077	107.692		R square	0.0567
	92.3077	92.3077	123.077
	92.3077	92.3077	138.462		Brown-Forsythe test
	92.3077	107.692	123.077		F (DFn, DFd)	4.51 (2, 207)
	92.3077	76.9231	76.9231		P value	0.0121
	92.3077	107.692	76.9231		P value summary	*
	92.3077	138.462	92.3077		Significantly different standard deviations? (P < 0.05)	Yes
	92.3077	107.692	76.9231
	138.462	107.692	61.5385		Bartlett's test
	83.7209	105.556	76.9231		Bartlett's statistic (corrected)	10.2
	97.6744	84.4444	76.9231		P value	0.006
	139.535	105.556	61.5385		P value summary	**
	97.6744	105.556	76.9231		Significantly different standard deviations? (P < 0.05)	Yes
	55.8139	168.889	126.667
	153.488	168.889	84.4444		ANOVA table	SS	DF	MS	F (DFn, DFd)	P value
	83.7209	105.556	147.778		Treatment (between columns)	9012	2	4506	F (2, 207) = 6.22	P = 0.0024
	83.7209	168.889	126.667		Residual (within columns)	150067	207	725
	111.628	168.889	105.556		Total	159079	209
	83.7209	105.556	126.667
	111.628	147.778	126.667		Data summary
	97.6744	147.778	126.667		Number of treatments (columns)	3
	125.581	63.3333	105.556		Number of values (total)	210
	69.7674	147.778	105.556
	69.7674	126.667	84.4444
	83.7209	126.667	105.556		Number of families	1
	167.442	141.573	126.667		Number of comparisons per family	3
	83.7209	141.573	126.667		Alpha	0.05
	126.667	141.573	126.667
	126.667	101.124	126.667		Sidak's multiple comparisons test	Mean Diff.	95% CI of diff.	Significant?	Summary
	105.556	182.023	105.556
	84.4444	101.124	105.556		control vs. 𝛼VEGFR2 + 𝛼Nrp1	-9.59	-20.2 to 1.06	No	ns		A-C
	84.4444	141.573	60.6742		control vs. 𝛼VEGFR2	-15.6	-26.6 to -4.67	Yes	**		A-E
	126.667	141.573	80.8989		𝛼VEGFR2 + 𝛼Nrp1 vs. 𝛼VEGFR2	-6.03	-17.7 to 5.62	No	ns		C-E
	147.778	101.124	60.6742
	105.556	101.124	80.8989
	84.4444	121.348	60.6742		Test details	Mean 1	Mean 2	Mean Diff.	SE of diff.	n1	n2	t	DF
	84.4444	101.124	101.124
	84.4444	80.8989	121.348		control vs. 𝛼VEGFR2 + 𝛼Nrp1	100	110	-9.59	4.43	86	65	2.17	207
	126.667	101.124	121.348		control vs. 𝛼VEGFR2	100	116	-15.6	4.55	86	59	3.43	207
	84.4444	101.124	60.6742		𝛼VEGFR2 + 𝛼Nrp1 vs. 𝛼VEGFR2	110	116	-6.03	4.84	65	59	1.25	207
	42.2222	101.124	161.798
	84.4444	80.8989	101.124
	84.4444	89.2857	161.798
	105.556	89.2857	182.023
	84.4444	89.2857	121.348
	126.667	107.143	60.6742
	101.124	89.2857	161.798
	101.124	107.143	202.247
	121.348	107.143	89.2857
	101.124	89.2857	107.143
	101.124	142.857	125
	80.8989	142.857	107.143
	121.348		125
	121.348		107.143
	101.124		125
	121.348		160.714
	80.8989		89.2857
	60.6742		142.857
	121.348
	121.348
	101.124
	60.6742
	80.8989
	101.124
	107.143
	107.143
	107.143
	107.143
	107.143
	89.2857
	107.143
	107.143
	107.143
	107.143
	53.5714
	89.2857
	89.2857
	107.143
	107.143

## Sheet: Figure 5 FS 3 E
Figure 5 - figure supplement 3 E
RAW DATA	ctrl	𝛼VEGFR2	𝛼VEGFR2 + 𝛼Nrp1		Table Analyzed	Branch length (% of control)
	148.399	132.206	199.846
	136.715	106.995	108.224		ANOVA summary
	108.839	72.7645	163.362		F	8.18
	103.715	167.666	173.405		P value	0.0004
	141.43	66.6154	95.3113		P value summary	***
	78.7087	145.939	175.865		Are differences among means statistically significant? (P < 0.05)	Yes
	62.1061	51.0377	111.709		R square	0.0732
	100.026	80.9634	129.131
	81.5783	155.778	120.933		Brown-Forsythe test
	92.4417	102.075	146.759		F (DFn, DFd)	7.78 (2, 207)
	51.0377	148.194	101.87		P value	0.0006
	111.094	107.2	85.6777		P value summary	***
	71.7397	151.063	69.0751		Significantly different standard deviations? (P < 0.05)	Yes
	80.7584	223.213	67.6403
	109.454	141.43	57.1868		Bartlett's test
	121.957	171.56	79.5286		Bartlett's statistic (corrected)	20.5
	79.6895	92.6767	125.032		P value	< 0.0001
	74.7761	94.2002	90.392		P value summary	****
	90.4376	116.036	102.075		Significantly different standard deviations? (P < 0.05)	Yes
	66.7918	87.0907	69.2801
	71.3981	176.213	71.3484		ANOVA table	SS	DF	MS	F (DFn, DFd)	P value
	127.442	215.061	63.7311		Treatment (between columns)	23581	2	11791	F (2, 207) = 8.18	P = 0.0004
	89.2092	111.974	100.04		Residual (within columns)	298446	207	1442
	81.0714	99.2784	156.916		Total	322027	209
	89.8234	192.971	149.806
	123.757	94.708	185.607		Data summary
	100.111	173.674	55.0982		Number of treatments (columns)	3
	111.166	134.826	93.6924		Number of values (total)	210
	132.816	75.4109	99.2784
	116.694	110.196	86.8368		Number of families	1
	63.1067	124.923	73.1258		Number of comparisons per family	3
	123.603	127.97	88.6142		Alpha	0.05
	126.213	132.574	104.103
	131.895	122.734	157.677		Sidak's multiple comparisons test	Mean Diff.	95% CI of diff.	Significant?	Summary	Adjusted P Value
	99.2784	204.191	134.318
	120.607	100.319	225.471		control vs. 𝛼VEGFR2 + 𝛼Nrp1	-20.5	-35.5 to -5.45	Yes	**	0.0036	A-C
	124.923	201.731	163.771		control vs. 𝛼VEGFR2	-22.6	-38.0 to -7.14	Yes	**	0.0016	A-E
	81.7587	86.9248	136.603		𝛼VEGFR2 + 𝛼Nrp1 vs. 𝛼VEGFR2	-2.12	-18.6 to 14.3	No	ns	0.9856	C-E
	81.7587	145.695	77.631
	109.689	177.13	153.895
	133.81	75.7175	66.4237		Test details	Mean 1	Mean 2	Mean Diff.	SE of diff.	n1	n2	t	DF
	114.513	147.608	85.8314
	76.6805	105.786	123.827		control vs. 𝛼VEGFR2 + 𝛼Nrp1	100	120	-20.5	6.24	86	65	3.28	207
	67.5398	91.0251	113.986		control vs. 𝛼VEGFR2	100	123	-22.6	6.42	86	59	3.52	207
	115.782	68.3371	142.415		𝛼VEGFR2 + 𝛼Nrp1 vs. 𝛼VEGFR2	120	123	-2.12	6.83	65	59	0.31	207
	121.622	118.907	141.868
	104.103	96.492	51.6629
	48.7505	82.2779	162.096
	59.1608	97.3121	82.2779
	65.2546	62.6516	210.205
	144.474	119.644	180.957
	72.6179	79.426	118.087
	157.677	117.421	102.232
	63.9635	78.0113	209.658
	97.5854	127.728	265.148
	133.941	91.5521	171.584
	107.153	133.791	78.8197
	84.7381	151.981	146.322
	95.3986	164.309	59.4179
	97.3121		90.9458
	157.722		102.263
	129.02		129.345
	102.779		125.505
	53.8497		98.4236
	49.4761		121.867
	100.592
	148.155
	77.0843
	122.187
	84.4647
	94.5786
	134.398
	128.739
	99.0299
	109.135
	103.678
	75.5861
	113.581
	123.484
	63.2579
	84.8828
	40.2183
	130.76
	83.266
	116.007
	93.9774
