# Supplementary material for: VEGF/VEGFR2 signaling regulates hippocampal axon branching during development
Source: eLife. 2019 Dec 23;8:e49818. doi: 10.7554/eLife.49818 (PMC6927742; doi:10.7554/eLife.49818)
Supplement: Figure 5—figure supplement 4—source data 1. [file elife-49818-fig5-figsupp4-data1.xlsx]

## Sheet: Figure 5 FS 4A
Figure 5 - figure supplement 4 A
RAW DATA	DMSO	DMSO+VEGF	Dynasore	Dynasore+VEGF
	2	6	2	4
	5	4	3	2		Table Analyzed	Axon branches/neuron
	4		1	3
	2	4	4	1		Two-way ANOVA	Ordinary
	1	5	1	1		Alpha	0.05
	2	4	1	2
	2	4	2	2		Source of Variation	% of total variation	P value	P value summary	Significant?
	2	4	3	3		Interaction	5.069	0.0019	**	Yes
	2	3	1	2		Row Factor	6.021	0.0008	***	Yes
	2	3	1	1		Column Factor	10.67	< 0.0001	****	Yes
	5	4	3	2
	1	5	2	3		ANOVA table	SS	DF	MS	F (DFn, DFd)	P value
	3	2	5	2		Interaction	11.91	1	11.91	F (1, 152) = 9.946	P = 0.0019
	3	2	3	5		Row Factor	14.14	1	14.14	F (1, 152) = 11.81	P = 0.0008
	3	4	3	4		Column Factor	25.05	1	25.05	F (1, 152) = 20.93	P < 0.0001
	3	2	3	1		Residual	182	152	1.197
	1	4	1	1
	2	2	1	1		Number of missing values	16
	3	4	2	1
	2	3	2	1		Compare cell means regardless of rows and columns
	3	3	3	3
	2	4	1	2		Number of families	1
	1	5	1	2		Number of comparisons per family	6
	3	5	2	2		Alpha	0.05
	2	6	3	1
	2	3	3	1		Tukey's multiple comparisons test	Mean Diff.	95% CI of diff.	Significant?	Summary	Adjusted P Value
	1	2	1	3
	1	3	2	2		unstim:DMSO vs. unstim:Dynasore	0.2506	-0.3738 to 0.8749	No	ns	0.7247
	3	1	3	3		unstim:DMSO vs. VEGF:DMSO	-1.162	-1.783 to -0.5418	Yes	****	< 0.0001
	2	2	4	3		unstim:DMSO vs. VEGF:Dynasore	0.2006	-0.4630 to 0.8641	No	ns	0.8611
	2	5	1	2		unstim:Dynasore vs. VEGF:DMSO	-1.413	-2.044 to -0.7812	Yes	****	< 0.0001
	3	3	2	2		unstim:Dynasore vs. VEGF:Dynasore	-0.05	-0.7241 to 0.6241	No	ns	0.9975
	1	2	3			VEGF:DMSO vs. VEGF:Dynasore	1.363	0.6924 to 2.033	Yes	****	< 0.0001
	3	2	1
	2	3	2
	2	3	1			Test details	Mean 1	Mean 2	Mean Diff.	SE of diff.	N1	N2	q	DF
	4	5	3
	1	3	1			unstim:DMSO vs. unstim:Dynasore	2.326	2.075	0.2506	0.2403	43	40	1.474	152
	3	3	1			unstim:DMSO vs. VEGF:DMSO	2.326	3.488	-1.162	0.2388	43	41	6.882	152
	3	2	1			unstim:DMSO vs. VEGF:Dynasore	2.326	2.125	0.2006	0.2554	43	32	1.11	152
	1	5				unstim:Dynasore vs. VEGF:DMSO	2.075	3.488	-1.413	0.2432	40	41	8.217	152
	3	4				unstim:Dynasore vs. VEGF:Dynasore	2.075	2.125	-0.05	0.2595	40	32	0.2725	152
	2					VEGF:DMSO vs. VEGF:Dynasore	3.488	2.125	1.363	0.2581	41	32	7.468	152

## Sheet: Figure 5 FS 4 B
Figure 5 - figure supplement 4 B
RAW DATA	DMSO	DMSO+VEGF	Dynasore	Dynasore+VEGF
	-0.0018	0.012	0.014	0.0098
	0.013	0.0078	0.011	0.006		Table Analyzed	Net branch growth rate
	0.015		0.0065	0.0087
	0.003	0.0071	0.021	0.0036		Two-way ANOVA	Ordinary
	0.0018	0.0099	-0.0019	-0.0067		Alpha	0.05
	0.0049	0.011	0.0012	0.00021
	0.0059	0.011	0.0034	0.0056		Source of Variation	% of total variation	P value	P value summary	Significant?
	-0.0015	0.019	0.006	0.01		Interaction	3.34	0.0178	*	Yes
	0.0078	0.0099	0.0022	0.0077		Row Factor	5.091	0.0036	**	Yes
	0.0044	0.0061	0.0044	0.0078		Column Factor	2.515	0.0392	*	Yes
	0.011	0.014	0.0027	0.0068
	0.00042	0.019	-6.9e-05	0.015		ANOVA table	SS	DF	MS	F (DFn, DFd)	P value
	0.0051	0.0044	0.0081	0.007		Interaction	0.0001408	1	0.0001408	F (1, 152) = 5.745	P = 0.0178
	0.0075	0.0049	0.0022	0.011		Row Factor	0.0002146	1	0.0002146	F (1, 152) = 8.757	P = 0.0036
	0.0036	0.0062	0.011	0.014		Column Factor	0.000106	1	0.000106	F (1, 152) = 4.326	P = 0.0392
	0.013	0.0072	0.0052	0.0033		Residual	0.003725	152	2.451e-05
	-6.9e-05	0.017	0.0017	0.0032
	0.0044	0.0092	0.0039	0.00083		Number of missing values	16
	0.0076	0.0098	0.0049	0.0033
	0.0072	0.0025	0.0044	0.0092
	0.016	0.006	0.016	0.0085		Compare cell means regardless of rows and columns
	0.0053	0.013	0.0072	0.015
	0.0028	0.013	0.0029	0.013		Number of families	1
	0.01	0.02	0.0051	0.0088		Number of comparisons per family	6
	0.0033	0.0076	0.012	0.0027		Alpha	0.05
	0.0044	0.0082	0.018	0.007
	0.0069	0	0.0019	0.0012		Tukey's multiple comparisons test	Mean Diff.	95% CI of diff.	Significant?	Summary	Adjusted P Value
	0.0022	0.012	0.0022	0.0076
	0.0092	0.00069	0.012	0.0026		unstim:DMSO vs. unstim:Dynasore	-0.0002529	-0.003078 to 0.002572	No	ns	0.9956
	0.0022	0.0033	0.0073	0.01		unstim:DMSO vs. VEGF:DMSO	-0.004273	-0.007080 to -0.001466	Yes	***	0.0007
	0.0055	0.023	0.007	0.0083		unstim:DMSO vs. VEGF:Dynasore	-0.0007017	-0.003704 to 0.002301	No	ns	0.9297
	0.01	0.019	0.013	0.0066		unstim:Dynasore vs. VEGF:DMSO	-0.00402	-0.006878 to -0.001162	Yes	**	0.002
	0.0035	0.0072	0.0061			unstim:Dynasore vs. VEGF:Dynasore	-0.0004488	-0.003499 to 0.002601	No	ns	0.9809
	0.0051	0.0074	0.005			VEGF:DMSO vs. VEGF:Dynasore	0.003572	0.0005383 to 0.006605	Yes	*	0.0139
	0.011	0.0097	0.0049
	0.0033	0.011	0.0032
	0.013	0.016	0.013			Test details	Mean 1	Mean 2	Mean Diff.	SE of diff.	N1	N2	q	DF
	-0.001	0.01	6.9e-05
	0.011	0.014	0.0031			unstim:DMSO vs. unstim:Dynasore	0.0061	0.006353	-0.0002529	0.001087	43	40	0.3289	152
	0.0052	0.0092	0.0023			unstim:DMSO vs. VEGF:DMSO	0.0061	0.01037	-0.004273	0.001081	43	41	5.593	152
	-6.9e-05	0.014				unstim:DMSO vs. VEGF:Dynasore	0.0061	0.006801	-0.0007017	0.001156	43	32	0.8586	152
	0.012	0.013				unstim:Dynasore vs. VEGF:DMSO	0.006353	0.01037	-0.00402	0.0011	40	41	5.168	152
	0.0092					unstim:Dynasore vs. VEGF:Dynasore	0.006353	0.006801	-0.0004488	0.001174	40	32	0.5405	152
						VEGF:DMSO vs. VEGF:Dynasore	0.01037	0.006801	0.003572	0.001168	41	32	4.326	152

## Sheet: Figure 5 FS 4 C
Figure 5 - figure supplement 4 C
RAW DATA	control	control +VEGF	Efnb2-/-	Efnb2-/- +VEGF
	1	1.7	1.3	1.3
	1.7	1.3	1.3	0.7		Table Analyzed	Branch number (% of control)
	0.7	1	1	1.3
	1	1	1	2.4		Two-way ANOVA	Ordinary
	0.7	1.3	1.3	1.3		Alpha	0.05
	1	1.7	1	0.7
	1.3	2.4	1.3	1		Source of Variation	% of total variation	P value	P value summary	Significant?
	1.7	0.7	0.7	0.7		Interaction	0.3153	0.0737	ns	No
	1.3	2	1	0.3		Row Factor	3.943	< 0.0001	****	Yes
	1	1.7	0.7	1.3		Column Factor	0.03272	0.5642	ns	No
	1	1.3	0.7	2
	1	1.7	0.7	1.3		ANOVA table	SS	DF	MS	F (DFn, DFd)	P value
	0.7	2	1	0.7		Interaction	0.5829	1	0.5829	F (1, 974) = 3.206	P = 0.0737
	0.7	1.3	1.7	1.7		Row Factor	7.287	1	7.287	F (1, 974) = 40.09	P < 0.0001
	0.7	1.3	1.3	1.3		Column Factor	0.06047	1	0.06047	F (1, 974) = 0.3327	P = 0.5642
	0.7	0.7	0.7	0.7		Residual	177.1	974	0.1818
	0.3	0.7	1	1.3
	0.7	1.3	0.7	1.7		Number of missing values	46
	1	1.3	1	2
	1	0.7	1.3	1.7		Number of families	1
	0.3	2	0.7	1.3		Number of comparisons per family	6
	1.3	1	1.3	0.3		Alpha	0.05
	1	0.7	1	0.7
	0.7	0.3	0.7	1.3		Sidak's multiple comparisons test	Mean Diff.	95% CI of diff.	Significant?	Summary
	1	1.3	1	1
	1	2	0.3	1.3		unstim:control vs. unstim:Efnb2-/-	-0.06463	-0.1657 to 0.03646	No	ns
	2	1.7	1	1.3		unstim:control vs. VEGF:control	-0.2217	-0.3258 to -0.1177	Yes	****
	1	0.7	1	2.4		unstim:control vs. VEGF:Efnb2-/-	-0.1886	-0.2896 to -0.08760	Yes	****
	1.3	2	1	1.3		unstim:Efnb2-/- vs. VEGF:control	-0.1571	-0.2597 to -0.05453	Yes	***
	1.7	1.3	1.3	0.3		unstim:Efnb2-/- vs. VEGF:Efnb2-/-	-0.124	-0.2234 to -0.02452	Yes	**
	1.4	0.7	1	0.7		VEGF:control vs. VEGF:Efnb2-/-	0.03314	-0.06934 to 0.1356	No	ns
	0.8	0.7	1	1
	1.7	1.1	1	2
	1.1	1.1	1	1.3		Test details	Mean 1	Mean 2	Mean Diff.	SE of diff.	N1	N2	t	DF
	0.6	1.4	0.7	1.7
	0.6	2	1.3	1		unstim:control vs. unstim:Efnb2-/-	0.9904	1.055	-0.06463	0.03834	240	255	1.686	974
	1.1	1.1	1.7	1.3		unstim:control vs. VEGF:control	0.9904	1.212	-0.2217	0.03947	240	227	5.617	974
	0.8	2	1	0.7		unstim:control vs. VEGF:Efnb2-/-	0.9904	1.179	-0.1886	0.03831	240	256	4.923	974
	0.8	0.8	1.3	0.3		unstim:Efnb2-/- vs. VEGF:control	1.055	1.212	-0.1571	0.03891	255	227	4.038	974
	0.8	1.4	0.7	1.7		unstim:Efnb2-/- vs. VEGF:Efnb2-/-	1.055	1.179	-0.124	0.03772	255	256	3.286	974
	0.8	1.7	0.7	1		VEGF:control vs. VEGF:Efnb2-/-	1.212	1.179	0.03314	0.03887	227	256	0.8526	974
	0.8	0.6	0.7	2
	0.8	1.4	1	1.3
	0.9	1.1	1	1.3
	0.9	1.7	1	1.3
	0.6	1.4	1	2
	0.9	0.6	0.7	1.3
	1.2	0.6	1	2
	1.6	2.2	1.7	1.7
	0.9	0.6	1	2.4
	0.6	0.8	0.7	1.7
	0.6	0.6	0.7	1.7
	1.6	1.4	1	2
	0.9	2	1	2.4
	0.9	0.6	1.3	1
	0.9	0.6	0.9	1.7
	0.9	0.6	1.2	0.7
	0.9	0.9	0.9	1.3
	1.2	0.9	1.2	1.7
	0.9	0.9	0.6	0.7
	1.2	1.2	1.8	1.7
	1.6	1.2	1.5	1
	1.9	0.6	1.5	1
	0.9	1.2	1.2	1.3
	0.6	0.6	1.8	1.7
	1.9	0.9	1.5	1.3
	0.9	1.9	1.5	1.5
	0.9	1.2	0.6	1.8
	0.3	1.2	1.8	1.2
	0.6	1.6	1.5	1.2
	1.2	0.9	1.5	1.2
	0.6	0.9	0.9	1.2
	2.2	0.9	0.6	1.5
	0.6	1.6	1.2	1.2
	1.2	1.6	2.1	1.2
	0.9	1.9	1.5	1.5
	0.9	1.2	1.8	1.5
	0.6	1.9	0.3	1.2
	1.6	1.6	0.6	1.2
	0.6	1.6	0.9	1.5
	0.6	0.9	2.4	1.8
	0.3	0.6	0.9	1.2
	0.3	1.9	0.9	0.6
	1.2	1.6	1.3	1.5
	1.2	1.6	1.3	1.5
	0.9	0.9	1.6	1.5
	1.2	1.2	1.6	0.9
	1.2	1.9	0.6	0.6
	0.6	0.6	1.3	1.2
	0.6	0.6	1.9	1.8
	0.9	0.9	1.3	0.6
	1.2	2.2	0.3	2.4
	0.6	0.6	0.9	0.6
	0.9	0.6	0.6	2.1
	1.6	2.2	1.6	1.8
	1.6	1.2	1.3	1.2
	0.9	1.2	0.6	0.9
	1.6	0.6	1.6	0.9
	0.9	1.6	0.9	1.5
	0.6	1.9	1.6	1.2
	1.2	0.3	0.9	1.8
	1.2	0.6	0.3	1.5
	0.6	0.6	0.6	2.7
	0.6	1.3	0.9	1.8
	0.6	0.6	0.6	0.6
	1.6	0.6	0.9	1.2
	1.2	0.6	1.6	1.6
	0.3	0.3	1.3	1.3
	1.2	1	1.9	0.9
	0.9	0.6	1.3	1.9
	1.3	1.6	1.6	0.6
	1	1.3	1.6	0.6
	1	0.6	1.6	1.6
	1.6	1.6	1.6	0.9
	1	0.6	1.6	0.6
	1.3	1.3	1.6	1.9
	1.6	1.9	0.6	0.9
	0.6	1.6	0.6	1.9
	0.6	1.3	0.6	1.6
	1.6	1.3	0.3	0.3
	1	1.3	1.3	1.3
	0.6	1.6	0.6	0.6
	0.3	1.9	1.3	0.9
	1	1.3	0.9	0.6
	1	1.9	1.3	0.6
	0.6	1.6	1.3	0.6
	1	1	0.9	0.9
	0.6	1	1.3	1.3
	1	1.3	0.9	1.3
	1.3	1.9	1.6	1.9
	1	1.6	1.6	1.3
	0.6	1.6	1.3	0.6
	0.6	1.3	0.9	0.3
	0.3	1.3	0.6	0.9
	1.3	1.3	0.6	0.9
	1	1	0.6	0.9
	1.3	2.6	1.3	0.9
	1	2.3	0.6	0.9
	1.3	1.3	0.9	0.9
	1	1	1.7	0.9
	1.6	0.93	1.7	1.2
	0.6	1.55	1.2	1.5
	0.9	1.24	0.6	0.6
	0.6	0.93	0.3	1.7
	0.9	0.93	0.9	0.6
	0.9	0.93	0.9	1.7
	0.9	1.24	1.5	1.2
	0.6	1.24	0.6	0.9
	0.9	0.93	0.9	0.9
	0.6	1.24	1.2	1.2
	0.6	0.93	0.9	0.9
	0.3	0.93	0.6	1.5
	0.9	1.24	1.2	0.9
	0.3	1.55	1.2	1.2
	2.2	1.24	0.9	1.7
	0.9	0.93	0.6	1.5
	1.2	1.24	1.5	0.9
	1.2	1.24	1.2	1.5
	1.2	1.24	0.3	1.7
	0.9	0.62	1.2	0.9
	1.2	1.24	0.9	0.6
	0.9	1.24	0.6	0.9
	1.9	1.55	1.2	0.9
	1.2	0.93	0.9	0.6
	0.9	1.24	1.5	0.6
	1.2	1.55	1.2	0.6
	1.6	1.24	0.9	0.9
	1.6	1.24	1.5	2
	0.9	1.57895	1.2	1.2
	0.6	1.84211	1.2	1.2
	0.9	1.57895	0.6	0.9
	0.9	0.789474	1.2	1.2
	0.9	1.31579	0.9	1.2
	0.9	1.05263	0.9	1.5
	1.6	1.31579	1.2	1.5
	0.9	1.05263	0.9	0.9
	1.2	1.57895	0.3	0.9
	1.2	1.05263	0.6	1.5
	0.6	1.05263	0.3	0.9
	0.6	1.05263	1.2	0.9
	0.9	1.05263	0.6	0.9
	0.789	1.31579	0.9	0.6
	1.316	0.789474	1.5	0.6
	1.053	0.789474	0.9	1.2
	1.316	1.05263	1.2	0.6
	0.526	1.05263	0.9	1.5
	0.526	1.05263	0.9	0.6
	1.053	0.789474	1.2	1.2
	0.526	0.789474	0.3	1.2
	1.053	0.263158	0.9	0.9
	1.053	0.263158	0.9	0.6
	1.316	1.31579	1.7	0.9
	1.053	1.05263	1.2	0.9
	0.789	0.789474	1.5	0.9
	1.579	1.31579	1.2	1.2
	0.789	1.57895	0.6	1.2
	1.053	0.789474	1.5	0.6
	0.789	1.05263	1.5	0.6
	1.053	1.06	1.2	1.2
	0.789	1.06	0.6	0.9
	0.526	1.33	0.9	0.6
	1.316	1.33	1.5	0.9
	0.526	1.6	0.6	0.6
	1.842	1.06	0.9	1.2
	1.316	0.8	1.2	1.2
	1.053	1.06	1.5	1.2
	1.053	1.6	1.5	1.2
	0.789	0.53	0.6	0.6
	1.316	0.8	0.9	1.2
	1.316	0.53	1.5	0.6
	0.526	1.06	1.0583	0.9
	1.33028	1.06	0.793722	1.85202
	1.06422	1.6	1.32287	2.11659
	0.798165	0.8	0.793722	1.32287
	0.798165	1.33	0.793722	1.0583
	1.06422	1.06	0.529148	0.793722
	1.86238	1.06	0.793722	1.85202
	1.33028	1.6	1.0583	2.11659
	1.06422	1.6	1.32287	1.58744
	1.59633	1.86	0.793722	1.58744
	1.33028	1.6	1.58744	1.32287
	0.798165	1.33	0.529148	1.0583
	0.53211	2.13	0.529148	1.0583
	1.33028	0.8	0.793722	0.793722
	1.06422	1.33	0.793722	0.793722
	0.53211	1.33	1.0583	0.793722
	1.06422	2.13	1.0583	1.32287
	0.53211		1.32287	0.529148
	0.53211		0.793722	1.0583
	0.798165		1.0583	1.0583
	1.06422		0.529148	1.0583
	1.06422		0.793722	1.0583
	0.798165		0.529148	0.793722
	0.53211		1.85202	1.32287
	1.06422		0.264574	1.58744
	1.06422		1.0583	1.32287
	0.53211		0.793722	1.32287
	0.798165		0.91131	1.85202
	0.798165		1.0583	1.85202
	1.86238		1.32287	0.793722
			1.32287	0.793722
			0.793722	1.58744
			0.529148	1.0583
			1.0583	0.529148
			1.0583	0.793722
			0.793722	0.529148
			0.793722	0.793722
			1.85202	0.793722
			1.0583	0.529148
			1.32287	1.32287
			0.793722	0.793722
			0.793722	0.793722
			1.32287	1.0583
			1.0583	0.793722
			1.58744	1.0583
				1.0583
				1.32287
				1.58744
				1.58744
				1.85202
				1.32287
				1.0583
				0.793722
				0.529148
				1.85202
				2.11659
				1.85202
				1.32287

## Sheet: Figure 5 FS 4 D
Figure 5 - figure supplement 4 D
RAW DATA	control	control +VEGF	Efnb2-/-	Efnb2-/- +VEGF
	1.1	2.8	1.4	2.1
	1.1	0.9	1.2	0.8		Table Analyzed	Branch length (% of control)
	0.7	0.8	1.8	1.6
	0.8	1.7	2.1	2.8		Two-way ANOVA	Ordinary
	0.5	1.3	1	0.8		Alpha	0.05
	0.9	1.9	0.8	1.1
	0.8	2.3	2.3	1.1		Source of Variation	% of total variation	P value	P value summary	Significant?
	1.4	0.5	0.5	1.8		Interaction	0.5664	0.016	*	Yes
	0.9	2.4	1.8	0.5		Row Factor	4.669	< 0.0001	****	Yes
	0.9	1.2	0.7	0.7		Column Factor	0.1736	0.1817	ns	No
	1.2	1.5	0.6	2.4
	1.4	1.8	0.8	1.2		ANOVA table	SS	DF	MS	F (DFn, DFd)	P value
	1.7	1.9	1.2	1.2		Interaction	1.865	1	1.865	F (1, 974) = 5.826	P = 0.0160
	0.5	0.5	1.8	1.3		Row Factor	15.37	1	15.37	F (1, 974) = 48.03	P < 0.0001
	0.9	1.5	1.8	0.8		Column Factor	0.5717	1	0.5717	F (1, 974) = 1.786	P = 0.1817
	0.6	0.8	1.2	1.1		Residual	311.8	974	0.3201
	0.8	0.3	1.8	2.4
	0.9	1.4	1	1.7		Number of missing values	46
	1.2	2	1	2.9
	0.6	1.5	1.5	1.8
	0.5	1.6	0.6	1.3		Number of families	1
	1.1	0.8	1.4	0.7		Number of comparisons per family	6
	1.2	0.7	1.1	1.2		Alpha	0.05
	0.8	0.6	0.9	0.9
	0.9	0.9	1.5	1		Sidak's multiple comparisons test	Mean Diff.	95% CI of diff.	Significant?	Summary
	1.5	1.9	0.5	1.1
	1.6	2	0.8	0.9		unstim:control vs. unstim:Efnb2-/-	-0.1359	-0.2700 to -0.001711	Yes	*
	1	1	2	3.6		unstim:control vs. VEGF:control	-0.3385	-0.4766 to -0.2004	Yes	****
	1.5	4	1.6	2		unstim:control vs. VEGF:Efnb2-/-	-0.2995	-0.4335 to -0.1655	Yes	****
	1.4	2	1.9	0.8		unstim:Efnb2-/- vs. VEGF:control	-0.2026	-0.3388 to -0.06654	Yes	***
	1.1	0.5	0.9	1		unstim:Efnb2-/- vs. VEGF:Efnb2-/-	-0.1636	-0.2956 to -0.03165	Yes	**
	1.1	0.3	0.8	0.6		VEGF:control vs. VEGF:Efnb2-/-	0.03903	-0.09696 to 0.1750	No	ns
	1.2	0.7	1.6	2
	0.8	0.6	1.1	2
	0.9	0.8	0.4	1.6		Test details	Mean 1	Mean 2	Mean Diff.	SE of diff.	N1	N2	t	DF
	0.5	1.1	1.9	0.6
	1.7	1.1	2.5	2		unstim:control vs. unstim:Efnb2-/-	1.003	1.139	-0.1359	0.05088	240	255	2.67	974
	1.1	2.1	0.7	0.5		unstim:control vs. VEGF:control	1.003	1.341	-0.3385	0.05238	240	227	6.462	974
	0.8	0.6	0.8	0.5		unstim:control vs. VEGF:Efnb2-/-	1.003	1.302	-0.2995	0.05083	240	256	5.891	974
	0.8	1.8	1.4	1.4		unstim:Efnb2-/- vs. VEGF:control	1.139	1.341	-0.2026	0.05163	255	227	3.925	974
	0.9	1.8	1.2	1.3		unstim:Efnb2-/- vs. VEGF:Efnb2-/-	1.139	1.302	-0.1636	0.05006	255	256	3.269	974
	1	0.6	1	1.9		VEGF:control vs. VEGF:Efnb2-/-	1.341	1.302	0.03903	0.05158	227	256	0.7566	974
	0.8	1.4	0.8	0.9
	1.2	1.5	1	1.1
	0.7	1.5	1.1	1.3
	1	1.8	1.9	2.2
	0.6	0.7	1.1	1.2
	1.4	0.5	0.7	2.5
	1.2	1.6	0.9	2.3
	0.9	0.5	1.6	2.9
	0.9	1	1.2	3.1
	1.3	0.8	0.6	1.7
	1.4	1.9	0.7	2.3
	0.6	2.9	1.3	2.8
	1.2	0.6	2.4	1.4
	0.9	0.5	1.2	2.2
	1.2	0.6	1.1	1.5
	0.5	0.7	0.7	1.6
	1.3	1.2	1.4	2
	0.8	0.9	0.8	0.8
	0.9	1.2	1.3	1.8
	1.8	1.4	1.8	0.9
	2.3	0.5	1.7	0.7
	1.4	1.9	1.3	2
	0.6	1	2.1	1.8
	1.8	1.3	1.2	1.5
	1	2.1	1.8	1.4
	0.9	1.5	1.3	1.8
	0.3	1.6	1.9	1
	0.9	2.9	0.8	1.2
	1.6	1.2	1.3	1.8
	0.9	1.3	0.8	1.2
	2.1	0.6	0.6	1.7
	0.7	2.4	1.6	1.3
	0.9	1.6	1.8	0.7
	0.7	3	2.7	2.2
	0.8	1.8	1.9	2.3
	0.7	2.9	0.4	1.3
	1.4	1.5	0.9	1.5
	0.6	1.1	1.1	2
	0.7	1.2	2.9	2.4
	0.4	0.6	1.3	0.8
	0.2	2.1	1.4	0.9
	1.4	1.1	1	2
	1	1.3	0.9	1.7
	0.7	0.4	1.5	2.6
	1	1.5	1.7	1
	1.2	2.2	1.2	0.7
	0.8	1.2	2.1	1
	0.7	0.5	1.8	2
	1.7	1	1.2	1
	1	1.8	0.4	2.4
	0.9	0.5	0.9	0.4
	1.1	0.6	1.1	3.2
	1.1	2.4	1.5	2.4
	0.9	1.8	0.7	2.6
	0.8	1	0.9	1.1
	2	0.7	1.7	0.9
	2.3	1.9	1.7	2.5
	0.5	2.4	2.2	1.6
	1.3	0.7	1.2	1.2
	1.3	0.8	0.3	2.8
	0.5	1.6	0.7	1.7
	0.6	1.6	1.6	2.5
	0.3	1	0.9	1.2
	0.9	1	1.1	0.7
	1	0.9	1.2	1.1
	0.3	0.2	1.4	0.7
	0.5	1	2.3	0.8
	0.6	1.2	1.6	1.6
	1.1	1.5	2.4	0.8
	1.2	1.1	0.9	0.8
	0.4	1.8	0.9	1.4
	1.2	0.9	2.1	0.6
	2.1	0.9	2	1
	1.7	1.8	1.9	1.5
	1.4	2	0.3	1.1
	0.7	0.9	0.5	1.1
	1	0.6	0.3	1.7
	1.7	0.9	0.4	0.8
	1.1	0.6	1.5	1.1
	0.3	3.1	0.8	0.6
	0.5	1.3	1.1	1
	1	2	0.8	0.6
	1	2.8	1.8	1.3
	0.9	2.3	1.9	0.4
	0.8	1.2	1.5	0.8
	0.6	0.9	1.6	1.6
	1.1	0.9	0.5	2.1
	1.6	1.9	1.5	2.4
	1	1.9	1.2	0.8
	0.5	1	1.8	0.5
	0.5	1.2	0.6	0.3
	0.3	1.4	0.6	1
	1.4	1.2	0.6	1.4
	0.8	0.5	0.7	1
	1.3	2.7	0.8	0.7
	1	3	0.7	0.7
	1.1	1.4	0.6	0.6
	0.9	1.3	1	0.6
	1	0.67	1.5	0.8
	0.6	1.4	2.2	2.2
	0.9	0.9	0.8	1
	0.4	1.12	0.2	2.1
	0.9	0.84	0.9	1.1
	0.5	1.29	0.4	1.6
	0.9	1.6	0.5	1
	0.5	2.24	0.5	0.6
	0.5	1.34	1	1.1
	0.5	1.85	1.2	1.2
	0.5	0.58	0.8	0.6
	0.4	0.61	0.4	1.4
	0.8	1.37	0.8	0.9
	1.1	2.46	1.2	1.7
	1.9	1.3	0.7	2.4
	0.9	1.5	0.6	1.8
	1	0.85	0.8	0.8
	2	1.59	0.8	0.7
	0.7	1.42	0.4	1.4
	1.1	1.27	0.9	1.2
	1.7	1.03	0.8	0.6
	1.5	1.1	0.4	1.9
	1.4	1.07	1.4	1.7
	1.4	1.21	1.1	1.2
	1.1	0.86	0.8	0.6
	2.1	1.37	1.1	1.1
	1.3	0.62	0.7	1
	1.3	1.24	1.1	2.2
	1	2.2587	1	1.3
	1.1	1.40603	1.6	1.1
	0.9	0.967517	0.7	1.7
	1.2	0.852668	1.2	1.3
	0.6	0.828306	1.5	0.8
	0.7	1.56612	1	1.1
	1.2	0.946636	0.6	0.7
	0.4	1.15545	0.8	1.8
	0.8	2.33179	0.3	0.6
	1.8	1.3051	0.8	1.3
	0.7	1.94199	0.6	0.6
	0.6	0.75174	1.3	1.4
	1.4	0.654292	0.7	1
	0.929234	1.63573	0.8	0.5
	1.16589	1.02668	1.3	0.5
	0.953596	0.720418	1	1.7
	1.43039	0.911833	1.4	0.5
	0.351508	0.835267	0.5	1.3
	0.49768	1.41995	1	0.6
	0.929234	0.62645	1	1.4
	0.769142	0.529002	0.3	0.8
	0.793504	0.407193	1.5	1.2
	1.30162	0.671694	1.3	1.2
	1.11369	1.92459	2	0.7
	0.675174	1.26334	1.5	1.4
	0.703016	0.800464	1.1	0.7
	1.37819	1.12065	1.2	1.7
	0.824826	2.02552	1.5	0.8
	1.32251	0.4942	2.1	0.7
	1.0406	0.793504	1	0.5
	1.13457	1.43	2.2	0.9
	0.762181	0.97	0.4	1.6
	0.643852	1.19	0.6	1
	0.939675	1.69	1.3	1.3
	0.25406	1.93	0.5	0.5
	2.2239	1.34	0.8	1.5
	1.48956	0.78	0.9	2.2
	1.34687	1.34	1.6	1.4
	0.887471	1.17	1.9	1.3
	0.609049	0.99	0.5	0.9
	1.54176	1.31	0.6	1
	1.33643	1.01	1.7	0.6
	0.650812	1.01	0.797201	0.9
	1.35731	2.19	0.668505	1.74455
	0.901192	2.18	1.39778	1.46571
	0.982116	1.07	0.933047	0.861549
	1.28006	1.58	1.17256	0.83295
	0.798199	1.2	0.761452	1.61943
	2.82128	1.84	1.22261	2.11991
	0.879122	1.9	0.904447	2.73479
	1.02993	1.6	1.03672	2.4059
	1.36466	1.66	1.36918	1.84464
	1.24696	2.71	2.3773	1.49788
	0.356799	0.83	0.757877	0.654205
	1.12925	2.82	0.65778	1.01169
	0.985794	1.29	1.04029	1.57295
	1.09247	0.95	1.46571	0.561258
	0.26484	1.58	1.03314	0.529084
	0.904871	2.97	1.99121	0.722128
	0.603247		1.25479	0.593432
	0.544394		0.897298	1.08677
	0.566464		0.65063	0.80435
	0.812912		0.554108	1.01169
	0.743024		0.8258	0.97237
	0.908549		0.65063	1.06174
	0.423009		2.06986	1.36561
	1.56329		0.357489	1.35488
	1.16603		1.15827	1.22619
	0.665779		0.479035	1.53363
	0.956367		1.05499	1.65518
	0.982116		1.03314	1.29768
	1.66996		0.936621	0.393238
			1.04387	1.16184
			0.875848	1.5372
			0.807925	1.07247
			0.857974	0.718553
			0.997395	0.65778
			0.600582	0.539809
			0.786476	0.843674
			0.943771	0.597007
			0.661355	0.950921
			1.21189	1.24406
			0.872273	0.750727
			1.02957	0.800776
			1.35131	0.890148
			0.983095	0.622031
			0.854399	0.879423
				1.01169
				1.37991
				1.16542
				1.22976
				2.11276
				1.26551
				1.10822
				0.929472
				0.278842
				1.29768
				2.90996
				2.88136
				1.10464

## Sheet: Figure 5 FS 4E
Figure 5 - figure supplement 4 E
RAW DATA	control	Nes-cre;Vegfr2lox/-;Efnb2lox/-		Table Analyzed	Branches/100µm
	0.295	0.331
	0.521	0.245		Column B	Nes-cre;Vegfr2lox/-;Efnb2lox/-
	0.323	0.172		vs.	vs.
	0.292	0.218		Column A	control
	0.301	0.554
	0.224	0.24		Unpaired t test
	0.392	0.248		P value	0.8567
	0.287	0.463		P value summary	ns
	0.330937	0.353		Significantly different? (P < 0.05)	No
	0.21	0.243		One- or two-tailed P value?	Two-tailed
	0.279	0.308		t, df	t=0.1819 df=34
	0.144693	0.217
	0.306	0.337		How big is the difference?
	0.254	0.287		Mean ± SEM of column A	0.2942 ± 0.02046, n=16
	0.278	0.229		Mean ± SEM of column B	0.2885 ± 0.02319, n=20
	0.27	0.149		Difference between means	-0.005777 ± 0.03176
		0.16		95% confidence interval	-0.07032 to 0.05876
		0.366		R squared	0.0009722
		0.411
		0.238		F test to compare variances
				F,DFn, Dfd	1.605, 19, 15
				P value	0.3563
				P value summary	ns
				Significantly different? (P < 0.05)	No
