# Supplementary material for: VEGF/VEGFR2 signaling regulates hippocampal axon branching during development
Source: eLife. 2019 Dec 23;8:e49818. doi: 10.7554/eLife.49818 (PMC6927742; doi:10.7554/eLife.49818)
Supplement: Figure 5—source data 1. [file elife-49818-fig5-data1.xlsx]

## Sheet: Figure 5 B
Figure 5 B
RAW DATA	control	Nes-cre;Vegfr2lox/-
	0.734294	0.627531
	0.506376	0.686019		Table Analyzed	Branches/100µm
	0.213464	0.692971
	0.55482	0.541333		Column B	Nes-cre;Vegfr2lox/-
	0.417402	0.9165		vs.	vs.
	0.600882	0.762714		Column A	control
	0.60751	0.595667
	0.557642	1.22225		Unpaired t test
	0.233327	0.862444		P value	0.0044
	0.508843	0.386429		P value summary	**
	0.254375	1.14785		Significantly different? (P < 0.05)	Yes
	0.485801	0.601236		One- or two-tailed P value?	Two-tailed
	0.35715	0.44111		t, df	t=3.076 df=31
	0.444755	0.442332
	0.38995	0.694475		How big is the difference?
		0.907832		Mean ± SEM of column A	0.4578 ± 0.03857, n=15
		0.523942		Mean ± SEM of column B	0.6854 ± 0.05931, n=18
		0.284504		Difference between means	0.2276 ± 0.07400
				95% confidence interval	0.07669 to 0.3786
				R squared	0.2338
				F test to compare variances
				F,DFn, Dfd	2.837, 17, 14
				P value	0.0547
				P value summary	ns
				Significantly different? (P < 0.05)	No

## Sheet: Figure 5 C
Figure 5 C
RAW DATA	0-100µm		>100µm
	control	Nes-cre;Vegfr2lox/-	control	Nes-cre;Vegfr2lox/-
	0.599026	0.538778	0.400974	0.476374		Table Analyzed	Event distribution (% of total events) - 0-100µm
	0.474736	0.481877	0.530142	0.518123
	0.307065	0.546619	0.734084	0.453381		Column B	Nes-cre;Vegfr2lox/-
	0.566434	0.520722	0.433566	0.509934		vs.	vs.
	0.486487	0.632867	0.544763	0.402681		Column A	control
	0.751054	0.571943	0.341339	0.456321
	0.670466	0.597758	0.39032	0.42076		Unpaired t test
	0.625905	0.718339	0.685898	0.288417		P value	0.1555
	0.314103	0.637592	0.454	0.362408		P value summary	ns
	0.57475	0.541573	0.592857	0.467199		Significantly different? (P < 0.05)	No
	0.407143	0.74108	0.462983	0.265677		One- or two-tailed P value?	Two-tailed
	0.55035	0.608835	0.571016	0.399102		t, df	t=1.456 df=31
	0.469549	0.482169	0.462388	0.517831
	0.537612	0.496073	0.576435	0.509482		How big is the difference?
	0.428195	0.604167		0.40625		Mean ± SEM of column A	0.5175 ± 0.03195, n=15
		0.595238		0.404762		Mean ± SEM of column B	0.5706 ± 0.02007, n=18
		0.569434		0.430566		Difference between means	0.05312 ± 0.03649
		0.386505		0.641273		95% confidence interval	-0.02130 to 0.1275
						R squared	0.064
						F test to compare variances
						F,DFn, Dfd	2.112, 14, 17
						P value	0.1445
						P value summary	ns
						Significantly different? (P < 0.05)	No
						Table Analyzed	Event distribution (% of total events) - >100µm
						Column B	Nes-cre;Vegfr2lox/-
						vs.	vs.
						Column A	control
						Unpaired t test
						P value	0.0499
						P value summary	*
						Significantly different? (P < 0.05)	Yes
						One- or two-tailed P value?	Two-tailed
						t, df	t=2.043 df=30
						How big is the difference?
						Mean ± SEM of column A	0.5129 ± 0.03018, n=14
						Mean ± SEM of column B	0.4406 ± 0.02063, n=18
						Difference between means	-0.07233 ± 0.03539
						95% confidence interval	-0.1446 to -4.345e-005
						R squared	0.1222
						F test to compare variances
						F,DFn, Dfd	1.665, 13, 17
						P value	0.3215
						P value summary	ns
						Significantly different? (P < 0.05)	No

## Sheet: Figure 5 E
Figure 5 E
RAW DATA	control	Nes-cre;Vegfr2lox/-
	13.9789	10.6761
	14.472	11.4691		Table Analyzed	synapses/100µm2
	11.52	9.13662
	11.3697	9.16373		Column B	Nes-cre;Vegfr2lox/-
				vs.	vs.
				Column A	control
				Unpaired t test
				P value	0.0338
				P value summary	*
				Significantly different? (P < 0.05)	Yes
				One- or two-tailed P value?	Two-tailed
				t, df	t=2.738 df=6
				How big is the difference?
				Mean ± SEM of column A	12.84 ± 0.8096, n=4
				Mean ± SEM of column B	10.11 ± 0.5781, n=4
				Difference between means	-2.724 ± 0.9948
				95% confidence interval	-5.158 to -0.2896
				R squared	0.5555
				F test to compare variances
				F,DFn, Dfd	1.961, 3, 3
				P value	0.5941
				P value summary	ns
				Significantly different? (P < 0.05)	No

## Sheet: Figure 5 F
Figure 5 F
RAW DATA	control	Nes-cre;Vegfr2lox/-
	0.42	0.145
	0.4	0.225		Table Analyzed	mEPSC frequency (Hz)
	0.115	0.15
	0.1	0.137		Column B	Nes-cre;Vegfr2lox/-
	0.27	0.201		vs.	vs.
	0.18	0.13		Column A	control
	0.1	0.125
	0.21	0.104		Unpaired t test
	0.35	0.1		P value	0.0042
	0.4	0.16		P value summary	**
	0.32	0.09		Significantly different? (P < 0.05)	Yes
	0.27			One- or two-tailed P value?	Two-tailed
	0.234			t, df	t=3.188 df=22
				How big is the difference?
				Mean ± SEM of column A	0.2592 ± 0.03187, n=13
				Mean ± SEM of column B	0.1425 ± 0.01248, n=11
				Difference between means	-0.1167 ± 0.03660
				95% confidence interval	-0.1926 to -0.04079
				R squared	0.316
				F test to compare variances
				F,DFn, Dfd	7.708, 12, 10
				P value	0.0029
				P value summary	**
				Significantly different? (P < 0.05)	Yes

## Sheet: Figure 5 G
Figure 5 G
RAW DATA	control	Nes-cre;Vegfr2lox/-
	14.7	14.04
	14.46	9.62		Table Analyzed	mEPSC amplitude (pA)
	9.08	9.58
	10.5	15.28		Column B	Nes-cre;Vegfr2lox/-
	14.2	18.17		vs.	vs.
	17.32	10.01		Column A	control
	15.59	11.84
	14.35	7.01		Unpaired t test
	12.61	8.78		P value	0.83
	10.43	11.268		P value summary	ns
	6.9	13.54		Significantly different? (P < 0.05)	No
	8.4			One- or two-tailed P value?	Two-tailed
	7.9			t, df	t=0.2172 df=22
				How big is the difference?
				Mean ± SEM of column A	12.03 ± 0.9278, n=13
				Mean ± SEM of column B	11.74 ± 0.9813, n=11
				Difference between means	-0.2940 ± 1.354
				95% confidence interval	-3.101 to 2.513
				R squared	0.00214
				F test to compare variances
				F,DFn, Dfd	1.056, 12, 10
				P value	0.9443
				P value summary	ns
				Significantly different? (P < 0.05)	No
