# Supplementary material for: VEGF/VEGFR2 signaling regulates hippocampal axon branching during development
Source: eLife. 2019 Dec 23;8:e49818. doi: 10.7554/eLife.49818 (PMC6927742; doi:10.7554/eLife.49818)
Supplement: Figure 6—figure supplement 1—source data 1. [file elife-49818-fig6-figsupp1-data1.xlsx]

## Sheet: Figure 6 FS 1A
Figure 6 - figure supplement 1A
RAW DATA	control	Nes-cre;Vegfr2lox/-
	18.3	38.079
	62.252	25.123		Table Analyzed	Branch retraction
	81.164	27.305
	56.063	37.275		Column C	Nes-cre;Vegfr2lox/-
	24.484	137.63		vs.	vs.
	89.385	0		Column A	control
	127.292	47.614
	69.568	0		Unpaired t test
	59.266	63.876		P value	0.4877
	20.261	22.932		P value summary	ns
	44.5	0		Significantly different? (P < 0.05)	No
	13.002	0		One- or two-tailed P value?	Two-tailed
	38.049	71.782		t, df	t=0.6955 df=169
	0	0
	0	54.789		How big is the difference?
	79.037	7.763		Mean ± SEM of column A	59.65 ± 4.568, n=110
	49.355	22.704		Mean ± SEM of column C	54.21 ± 6.509, n=61
	69.564	50.511		Difference between means	-5.437 ± 7.817
	0	175.503		95% confidence interval	-20.87 to 9.995
	20.912	26.932		R squared	0.002854
	0	54.49
	29.439	62.667		F test to compare variances
	0	0		F,DFn, Dfd	1.126, 60, 109
	188.812	153.764		P value	0.586
	58.722	0		P value summary	ns
	26.452	0		Significantly different? (P < 0.05)	No
	85.292	41.767
	18.705	95.551
	142.494	8.517
	121.905	70.974
	69.1	165.603
	37.245	65.494
	0	23.179
	37.438	22.608
	0	25.151
	36.64	119.241
	57.051	37.274
	36.675	30.751
	136.891	32.995
	131.276	50.499
	91.6	0
	80.483	55.63
	126.408	22.941
	146.736	82.314
	163.48	85.343
	38.23	0
	56.63	35.673
	51.091	158.455
	117.598	206.357
	39.953	29.452
	44.3	72.13
	55.009	127.322
	0	110.44
	113.741	26.7
	23.653	73.249
	32.692	37.801
	65.97	0
	36.5	83.564
	104.208	51.979
	79.965	27.751
	67.1	149.242
	68.141
	0
	103.066
	78.26
	31.612
	116.123
	17.588
	71.241
	12.044
	105.9
	47.527
	96.754
	159.957
	16.557
	207.784
	55.334
	55.874
	90.963
	154.48
	46.4
	62.204
	16.75
	160.634
	76.493
	0
	0
	36.169
	0
	98.589
	90.5
	89.124
	91.712
	59.971
	0
	55.372
	0
	12.393
	16.215
	131.334
	50.5
	0
	0
	33.371
	113.617
	41.912
	0
	0
	49.042
	67.505

## Sheet: Figure 6 FS 1B
Figure 6 - figure supplement 1B
RAW DATA	control	Nes-cre;Vegfr2lox/-
	0.0013	0.00264
	0.0043	0.00174		Table Analyzed	Branch retraction rate
	0.0056	0.0019
	0.0039	0.00259		Column C	Nes-cre;Vegfr2lox/-
	0.0017	0.00956		vs.	vs.
	0.0062	0		Column A	control
	0.0088	0.00331
	0.0048	0		Unpaired t test
	0.0041	0.00444		P value	0.5013
	0.0014	0.00159		P value summary	ns
	0.0031	0		Significantly different? (P < 0.05)	No
	0.0009	0		One- or two-tailed P value?	Two-tailed
	0.0026	0.00498		t, df	t=0.6740 df=169
	0	0
	0	0.0038		How big is the difference?
	0.0055	0.00054		Mean ± SEM of column A	0.004129 ± 0.0003151, n=110
	0.0034	0.00158		Mean ± SEM of column C	0.003765 ± 0.0004520, n=61
	0.0048	0.00351		Difference between means	-0.0003643 ± 0.0005406
	0	0.01219		95% confidence interval	-0.001432 to 0.0007028
	0.0015	0.00187		R squared	0.002681
	0	0.00378
	0.002	0.00435		F test to compare variances
	0	0		F,DFn, Dfd	1.141, 60, 109
	0.013	0.01068		P value	0.545
	0.0041	0		P value summary	ns
	0.0018	0		Significantly different? (P < 0.05)	No
	0.0059	0.0029
	0.0013	0.00664
	0.0099	0.00059
	0.0085	0.00493
	0.0048	0.0115
	0.0026	0.00455
	0	0.00161
	0.0026	0.00157
	0	0.00175
	0.0025	0.00828
	0.004	0.00259
	0.0025	0.00214
	0.0095	0.00229
	0.0091	0.00351
	0.0064	0
	0.0056	0.00386
	0.0088	0.00159
	0.01	0.00572
	0.011	0.00593
	0.0027	0
	0.0039	0.00248
	0.0035	0.011
	0.0082	0.01433
	0.0028	0.00205
	0.0031	0.00501
	0.0038	0.00884
	0	0.00767
	0.0079	0.00185
	0.0016	0.00509
	0.0023	0.00263
	0.0046	0
	0.0025	0.0058
	0.0072	0.00361
	0.0056	0.00193
	0.0047	0.01036
	0.0047
	0
	0.0072
	0.0054
	0.0022
	0.0081
	0.0012
	0.0049
	0.00084
	0.0074
	0.0033
	0.0067
	0.011
	0.0011
	0.014
	0.0038
	0.0039
	0.0063
	0.011
	0.0032
	0.0043
	0.0012
	0.011
	0.0053
	0
	0
	0.0025
	0
	0.0068
	0.0063
	0.0062
	0.0064
	0.0042
	0
	0.0038
	0
	0.00086
	0.0011
	0.0091
	0.0035
	0
	0
	0.0023
	0.0079
	0.0029
	0
	0
	0.0034
	0.0047

## Sheet: Figure 6 FS 1D
Figure 6 - figure supplement 1D
RAW DATA	control	a-VEGFR2
	142.105	101.504
	40.6015	182.707		Table Analyzed	Branch number (% of control)
	121.805	223.308
	81.203	81.203		Column C	a-VEGFR2
	121.805	142.105		vs.	vs.
	81.203	182.707		Column A	control
	81.203	223.308
	81.203	121.805		Unpaired t test
	101.504	162.406		P value	0.0116
	81.203	81.203		P value summary	*
	40.6015	182.707		Significantly different? (P < 0.05)	Yes
	101.504	142.105		One- or two-tailed P value?	Two-tailed
	101.504	223.308		t, df	t=2.552 df=173
	182.707	162.406
	182.707	101.504		How big is the difference?
	142.105	223.308		Mean ± SEM of column A	99.02 ± 6.772, n=102
	121.805	81.203		Mean ± SEM of column C	124.3 ± 6.928, n=73
	81.203	60.9023		Difference between means	25.32 ± 9.922
	121.805	182.707		95% confidence interval	5.735 to 44.90
	101.504	142.105		R squared	0.03627
	81.203	162.406
	60.9023	142.105		F test to compare variances
	101.504	182.707		F,DFn, Dfd	1.335, 101, 72
	182.707	121.805		P value	0.1953
	60.9023	121.805		P value summary	ns
	20.3008	121.805		Significantly different? (P < 0.05)	No
	81.203	223.308
	0	142.105
	53.9326	121.805
	0	142.105
	107.865	121.805
	107.865	81.203
	269.663	53.9326
	107.865	215.73
	53.9326	161.798
	53.9326	107.865
	107.865	161.798
	107.865	107.865
	161.798	53.9326
	431.461	53.9326
	161.798	161.798
	161.798	161.798
	161.798	53.9326
		107.865
	161.798	0
	0	53.9326
	161.798	53.9326
	0	96
	161.798	160
	161.798	32
	0	32
	0	96
	0	128
	53.9326	128
	215.73	224
	53.9326	128
	269.663	32
	53.9326	160
	107.865	256
	53.9326	64
	53.9326	247.059
	107.865	70.5882
	53.9326	70.5882
	0	70.5882
	0	105.882
	161.798	70.5882
	0	105.882
	0	70.5882
	53.9326	211.765
	107.865	105.882
	161.798	70.5882
	53.9326	70.5882
	161.798	70.5882
	107.865
	107.865
	161.798
	96
	96
	0
	96
	128
	64
	160
	32
	128
	105.882
	105.882
	176.471
	35.2941
	141.177
	211.765
	105.882
	105.882
	105.882
	105.882
	70.5882
	70.5882
	70.5882
	35.2941
	176.471
	35.2941
	105.882
	35.2941

## Sheet: Figure 6 FS 1E
Figure 6 - figure supplement 1E
RAW DATA	control	a-VEGFR2
	83.3246	255.603
	17.962	236.44		Table Analyzed	Branch length (% of control)
	136.195	0
	121.937	59.3735		Column C	a-VEGFR2
	78.1731	149.82		vs.	vs.
	85.0172	92.5312		Column A	control
	81.7359	165.146
	64.3081	65.6433		Unpaired t test
	75.8693	86.7197		P value	0.012
	75.5789	104.36		P value summary	*
	13.4837	143.431		Significantly different? (P < 0.05)	Yes
	176.293	101.242		One- or two-tailed P value?	Two-tailed
	95.6459	186.959		t, df	t=2.539 df=173
	89.9455	131.988
	127.665	41.9865		How big is the difference?
	135.447	234.49		Mean ± SEM of column A	100.0 ± 6.837, n=102
	80.9388	58.2165		Mean ± SEM of column C	127.9 ± 8.781, n=73
	107.448	59.6252		Difference between means	27.87 ± 10.98
	114.818	119.317		95% confidence interval	6.201 to 49.53
	104.596	91.1745		R squared	0.03592
	74.8012	134.026
	101.579	244.768		F test to compare variances
	148.447	156.294		F,DFn, Dfd	1.180, 72, 101
	163.629	162.182		P value	0.439
	132.765	163.28		P value summary	ns
	36.0471	112.259		Significantly different? (P < 0.05)	No
	176.352	290.5
	0	297.427
	90.546	76.1508
	0	150.048
	191.542	210.386
	110.62	87.7246
	240.748	50.0411
	125.149	249.104
	52.7957	124.322
	48.572	46.6438
	132.311	191.717
	130.841	138.279
	208.52	86.7686
	241.483	29.0147
	169.864	146.542
	137.82	136.718
	240.473	82.7285
	133.504	82.4531
	0	0
	261.132	105.316
	0	76.3012
	113.212	111.521
	154.623	122.581
	0	81.106
	0	18.4332
	0	135.945
	28.2801	180.184
	178.404	159.447
	61.8857	331.797
	184.372	243.318
	43.2465	59.447
	74.0976	211.06
	206.775	238.249
	24.4237	66.8203
	104.949	279.622
	24.9747	26.8657
	0	33.9933
	0	99.2385
	205.123	75.6625
	0	116.235
	0	158.453
	27.2701	82.2418
	57.1112	157.904
	180.056	124.459
	14.5991	66.89
	120.65	87.1764
		50.4417
	78.6885
	192.635
	208.704
	76.0369
	60.3687
	142.857
	95.8525
	161.29
	44.2396
	200.922
	22.1198
	96.3134
	234.115
	88.8212
	243.984
	72.9211
	137.07
	191.898
	75.1142
	92.6592
	32.8967
	78.9522
	76.2108
	33.445
	41.1209
	58.1176
	145.842
	37.283
	113.494
	46.0554

## Sheet: Figure 6 FS 1F
Figure 6 - figure supplement 1F
RAW DATA	control	a-VEGFR2
	0.0019	0.015
	0.0063	0.0076		Table Analyzed	Net branch growth rate
	0.0038	0.0083
	0.019	0.015		Column E	a-VEGFR2
	0.0026	0.011		vs.	vs.
	0.01	0.0058		Column C	control
	0.014	0.0066
	0.0017	0.0076		Unpaired t test
	0.00028	0.016		P value	0.0008
	0.012	0.017		P value summary	***
	-0.0025	0.0036		Significantly different? (P < 0.05)	Yes
	0.0047	0.01		One- or two-tailed P value?	Two-tailed
	0.0028	0.013		t, df	t=3.458 df=94
	0.0048	0.0029
	0.0069	0.014		How big is the difference?
	0.018	0.0065		Mean ± SEM of column C	0.007327 ± 0.0006759, n=50
	0.0096	0.015		Mean ± SEM of column E	0.01047 ± 0.0005994, n=46
	0.0069	0.0073		Difference between means	0.003145 ± 0.0009095
	0.0058	0.0096		95% confidence interval	0.001339 to 0.004951
	0.008	0.0072		R squared	0.1128
	0.0066	0.0096
	0.0025	0.01		F test to compare variances
	0.014	0.011		F,DFn, Dfd	1.382, 49, 45
	0.00097	0.012		P value	0.2739
	0.0074	0.01		P value summary	ns
	0.00069	0.011		Significantly different? (P < 0.05)	No
	0.0028	0.0098
	0.0051	0.0093
	0.014	0.0088
	0.0063	0.01
	0.0064	0.0083
	0.0069	0.016
	0.0026	0.011
	0.011	0.0057
	0.009	0.01
	0.006	0.011
	0.0051	0.023
	0.015	0.0058
	0.0087	0.0076
	0.0049	0.016
	0.0044	0.011
	0.0047	0.018
	0.0043	0.011
	0.013	0.012
	0.01	0.011
	0.014	0.0038
	0.0092
	0.011
	0.0092
	0.014

## Sheet: Figure 6 FS 1G
Figure 6 - figure supplement 1G
RAW DATA	control	a-VEGFR2
	1	2
	2	2		Table Analyzed	Retracting axon branches/neuron
	1	0
	0	1		Column E	a-VEGFR2
	1	0		vs.	vs.
	1	1		Column C	control
	1	1
	0	0		Unpaired t test
	1	1		P value	0.2167
	1	1		P value summary	ns
	2	1		Significantly different? (P < 0.05)	No
	1	1		One- or two-tailed P value?	Two-tailed
	0	1		t, df	t=1.244 df=94
	0	0
	1	0		How big is the difference?
	0	1		Mean ± SEM of column C	0.9020 ± 0.09804, n=51
	2	1		Mean ± SEM of column E	0.7333 ± 0.09211, n=45
	2	1		Difference between means	-0.1686 ± 0.1356
	1	0		95% confidence interval	-0.4378 to 0.1006
	2	0		R squared	0.01619
	1	2
	1	1		F test to compare variances
	2	1		F,DFn, Dfd	1.284, 50, 44
	1	0		P value	0.4006
	2	0		P value summary	ns
	2	1		Significantly different? (P < 0.05)	No
	2	1
	1	0
	0	1
	1	1
	1	1
	0	1
	0	0
	1	1
	1	0
	1	1
	1	1
	1	1
	1	2
	2	0
	0	1
	0	0
	1	0
	1	0
	0	1
	1
	0
	0
	0
	0
	1

## Sheet: Figure 6 FS 1H
Figure 6 - figure supplement 1H
RAW DATA	control	a-VEGFR2
	0.0034	0.0058
	0.0056	0.0049		Table Analyzed	Branch retraction rate
	0.006	0
	0	0.0027		Column E	a-VEGFR2
	0.0042	0		vs.	vs.
	0.0054	0.0023		Column C	control
	0.0025	0.0019
	0	0		Unpaired t test
	0.0056	0.0017		P value	0.1026
	0.0072	0.0058		P value summary	ns
	0.014	0.0014		Significantly different? (P < 0.05)	No
	0.0054	0.0063		One- or two-tailed P value?	Two-tailed
	0	0.0033		t, df	t=1.649 df=94
	0	0
	0.0028	0		How big is the difference?
	0	0.0013		Mean ± SEM of column C	0.003216 ± 0.0004200, n=51
	0.0083	0.002		Mean ± SEM of column E	0.002309 ± 0.0003408, n=45
	0.0053	0.0023		Difference between means	-0.0009068 ± 0.0005500
	0.0031	0		95% confidence interval	-0.001999 to 0.0001853
	0.0059	0.0036		R squared	0.0281
	0.002	0.009
	0.0032	0.0033		F test to compare variances
	0.0085	0.0068		F,DFn, Dfd	1.721, 50, 44
	0.0047	0		P value	0.0687
	0.0056	0		P value summary	ns
	0.005	0.0026		Significantly different? (P < 0.05)	No
	0.007	0.0069
	0.0016	0
	0	0.0024
	0.0031	0.0036
	0.0043	0.0033
	0	0.0024
	0	0
	0.0014	0.0015
	0.0027	0
	0.0019	0.0017
	0.0022	0.0017
	0.003	0.0035
	0.0036	0.0044
	0.0084	0
	0	0.0023
	0	0
	0.0026	0
	0.0017	0
	0	0.0032
	0.0036
	0
	0
	0
	0
	0.0032

## Sheet: Figure 6 FS 1I
Figure 6 - figure supplement 1 I
RAW DATA	control	a-VEGFR2
	8.39748	6.35843
	5.87352	9.27018		Table Analyzed	Actin patches in 2' per 10µm
	8.57524	5.4921
	9.26115	6.36399		Column C	a-VEGFR2
	6.38303	5.33245		vs.	vs.
	3.44533	3.17822		Column A	control
	4.38178	5.69435
	3.26534	7.15294		Unpaired t test
	3.33519	9.84212		P value	0.9716
	4.681	3.8625		P value summary	ns
	4.68597	4.0423		Significantly different? (P < 0.05)	No
	5.56458	2.07217		One- or two-tailed P value?	Two-tailed
	4.32068	3.80999		t, df	t=0.03567 df=107
	4.64287	4.05814
	8.56868	6.17822		How big is the difference?
	6.90346	2.84123		Mean ± SEM of column A	5.552 ± 0.2904, n=53
	5.68306	4.4729		Mean ± SEM of column C	5.537 ± 0.3136, n=56
	6.45624	7.05228		Difference between means	-0.01529 ± 0.4286
	4.44162	4.9902		95% confidence interval	-0.8650 to 0.8344
	4.87805	4.59488		R squared	1.189e-05
	3.97456	5.18438
	5.31697	2.73488		F test to compare variances
	5.64663	8.08823		F,DFn, Dfd	1.232, 55, 52
	7.67441	11.3786		P value	0.4505
	10.8834	9.61538		P value summary	ns
	7.55878	3.88489		Significantly different? (P < 0.05)	No
	7.63617	4.57905
	6.44182	2.14648
	6.91432	7.84844
	7.39521	3.69526
	7.01897	4.18802
	5.54203	5.11536
	1.92421	9.8173
	4.87615	3.40784
	7.52601	2.70704
	4.10341	2.28298
	2.54236	3.83975
	5.62864	5.66876
	4.23072	3.77863
	4.50634	3.55609
	3.35149	7.69738
	7.7963	6.46289
	1.17181	6.7601
	3.46908	5.31434
	5.6488	2.44852
	1.81499	4.66699
	9.60098	4.84913
	5.03609	5.64972
	3.02816	10.0225
	7.18538	4.11942
	2.80706	6.82466
	5.00766	3.87409
	7.26472	7.80347
		7.42198
		11.0433
		4.93279

## Sheet: Figure 6 FS 1J
Figure 6 - figure supplement 1 J
RAW DATA	filopodia		protrusion
	control	a-VEGFR2	control	a-VEGFR2
	32.6531	40	67.3469	60		Table Analyzed	% of events - filopodia
	12.5	29.4118	87.5	70.5882
	10.7143	38.6364	89.2857	61.3636		Column C	a-VEGFR2
	7.69231	58.3333	92.3077	41.6667		vs.	vs.
	20.8333	16	79.1667	84		Column A	control
	3.125	13.0435	96.875	86.9565
	26.8293	33.3333	73.1707	66.6667		Unpaired t test
	8.82353	9.7561	91.1765	90.2439		P value	0.011
	27.5862	25.9259	72.4138	74.0741		P value summary	*
	18.75	18.75	81.25	81.25		Significantly different? (P < 0.05)	Yes
	9.67742	50	90.3226	50		One- or two-tailed P value?	Two-tailed
		22.5		77.5		t, df	t=2.767 df=23
		25.641		74.359
		40		60		How big is the difference?
						Mean ± SEM of column A	16.29 ± 2.900, n=11
						Mean ± SEM of column C	30.10 ± 3.780, n=14
						Difference between means	13.81 ± 4.989
						95% confidence interval	3.486 to 24.13
						R squared	0.2498
						F test to compare variances
						F,DFn, Dfd	2.162, 13, 10
						P value	0.2273
						P value summary	ns
						Significantly different? (P < 0.05)	No
						Table Analyzed	% of events - protrusion
						Column C	a-VEGFR2
						vs.	vs.
						Column A	control
						Unpaired t test
						P value	0.011
						P value summary	*
						Significantly different? (P < 0.05)	Yes
						One- or two-tailed P value?	Two-tailed
						t, df	t=2.767 df=23
						How big is the difference?
						Mean ± SEM of column A	83.71 ± 2.900, n=11
						Mean ± SEM of column C	69.90 ± 3.780, n=14
						Difference between means	-13.81 ± 4.989
						95% confidence interval	-24.13 to -3.486
						R squared	0.2498
						F test to compare variances
						F,DFn, Dfd	2.162, 13, 10
						P value	0.2273
						P value summary	ns
						Significantly different? (P < 0.05)	No

## Sheet: Figure 6 FS 1K
Figure 6 - figure supplement 1 K
RAW DATA	control		a-VEGFR2
	0-2µm	>2µm	0-2µm	>2µm
	73.4694	26.5306	80	20		Table Analyzed	Event distribution (% of total events) - 0-2µm
	91.6667	8.33333	82.3529	17.6471
	100	0	81.8182	18.1818		Column C	a-VEGFR2
	92.3077	7.69231	50	50		vs.	vs.
	91.6667	8.33333	86	14		Column A	control
	100	0	95.6522	4.34783
	82.9268	17.0732	85.7143	14.2857		Unpaired t test
	94.1176	5.88235	90.2439	9.7561		P value	0.0072
	82.7586	17.2414	81.4815	18.5185		P value summary	**
			75	25		Significantly different? (P < 0.05)	Yes
	87.5	12.5	56.25	43.75		One- or two-tailed P value?	Two-tailed
	100	0	72.5	27.5		t, df	t=2.951 df=23
			82.0513	17.9487
			64	36		How big is the difference?
						Mean ± SEM of column A	90.58 ± 2.534, n=11
						Mean ± SEM of column C	77.36 ± 3.427, n=14
						Difference between means	-13.22 ± 4.480
						95% confidence interval	-22.49 to -3.953
						R squared	0.2747
						F test to compare variances
						F,DFn, Dfd	2.329, 13, 10
						P value	0.1863
						P value summary	ns
						Significantly different? (P < 0.05)	No
						Table Analyzed	Event distribution (% of total events) - >2µm
						Column D	a-VEGFR2
						vs.	vs.
						Column B	control
						Unpaired t test
						P value	0.0072
						P value summary	**
						Significantly different? (P < 0.05)	Yes
						One- or two-tailed P value?	Two-tailed
						t, df	t=2.951 df=23
						How big is the difference?
						Mean ± SEM of column B	9.417 ± 2.534, n=11
						Mean ± SEM of column D	22.64 ± 3.427, n=14
						Difference between means	13.22 ± 4.480
						95% confidence interval	3.953 to 22.49
						R squared	0.2747
						F test to compare variances
						F,DFn, Dfd	2.329, 13, 10
						P value	0.1863
						P value summary	ns
						Significantly different? (P < 0.05)	No
