# Supplementary material for: VEGF/VEGFR2 signaling regulates hippocampal axon branching during development
Source: eLife. 2019 Dec 23;8:e49818. doi: 10.7554/eLife.49818 (PMC6927742; doi:10.7554/eLife.49818)
Supplement: Figure 6—source data 1. [file elife-49818-fig6-data1.xlsx]

## Sheet: Figure 6 B
Figure 6 B
RAW DATA	control	Nes-cre;Vegfr2lox/-
	142.1	94.7
	94.7	157.9		Table Analyzed	Branch number (% of control)
	157.9	110.5
	126.3	126.3		Column C	Nes-cre;Vegfr2lox/-
	31.6	47.4		vs.	vs.
	94.7	78.9		Column A	control
	126.3	110.5
	78.9	78.9		Unpaired t test
	78.9	63.2		P value	< 0.0001
	157.9	126.3		P value summary	****
	94.7	31.6		Significantly different? (P < 0.05)	Yes
	63.2	63.2		One- or two-tailed P value?	Two-tailed
	110.5	47.4		t, df	t=3.975 df=359
	110.5	94.7
	63.2	63.2		How big is the difference?
	110.5	78.9		Mean ± SEM of column A	100.0 ± 3.125, n=149
	47.4	110.5		Mean ± SEM of column C	119.0 ± 3.359, n=212
	110.5	142.1		Difference between means	19.03 ± 4.788
	78.3	110.5		95% confidence interval	9.616 to 28.45
	78.3	94.7		R squared	0.04216
	156.5	137
	176.1	78.3		F test to compare variances
	137	97.8		F,DFn, Dfd	1.643, 211, 148
	97.8	176.1		P value	0.0014
	137	78.3		P value summary	**
	78.3	97.8		Significantly different? (P < 0.05)	Yes
	117.4	176.1
	58.7	78.3
	78.3	137
	117.4	58.7
	117.4	97.8
	97.8	78.3
	156.5	78.3
	117.4	58.7
	78.3	97.8
	97.8	117.4
	117.4	156.5
	58.7	58.7
	97.8	78.3
	78.3	195.7
	39.1	156.5
	58.7	78.3
	58.7	97.8
	117.4	97.8
	97.8	97.8
	188.5	156.5
	188.5	58.7
	161.5	39.1
	188.5	78.3
	134.6	58.7
	107.7	117.4
	107.7	58.7
	53.8	97.8
	134.6	78.3
	134.6	78.3
	161.5	137
	107.7	215.2
	80.8	176.1
	188.5	137
	80.8	78.3
	134.6	215.4
	188.5	161.5
	161.5	188.5
	26.9	134.6
	53.8	80.8
	53.8	107.7
	53.8	215.4
	107.7	134.6
	80.8	107.7
	26.9	188.5
	26.9	215.4
	134.6	134.6
	53.8	215.4
	53.8	242.3
	53.8	161.5
	53.8	134.6
	53.8	134.6
	53.8	188.5
	80.8	80.8
	26.9	161.5
	72.15	80.8
	96.2	161.5
	96.2	188.5
	120.25	161.5
	72.15	242.3
	96.2	134.6
	144.3	215.4
	72.15	188.5
	72.15	134.6
	72.15	134.6
	120.25	107.7
	120.25	134.6
	96.2	107.7
	72.15	134.6
	72.15	215.4
	96.2	134.6
	120.25	107.7
	120.25	242.3
	72.15	242.3
	72.15	161.5
	96.2	53.8
	96.2	80.8
	96.2	107.7
	120.25	188.5
	144.3	215.4
	96.2	134.6
	120.25	107.7
	96.2	107.7
	96.2	107.7
	72.15	134.6
	96.2	107.7
	144.3	134.6
	120.25	107.7
	144.3	134.6
	96.2	161.5
	96.2	26.9
	48.1	134.6
	144.3	242.3
	112.32	269.2
	44.93	134.6
	44.93	134.6
	112.32	188.5
	67.39	107.7
	134.78	134.6
	134.78	215.4
	112.32	215.4
	44.93	161.5
	89.86	188.5
	112.32	242.3
	89.86	80.8
	112.32	80.8
	89.86	53.8
	67.39	53.8
	67.39	107.7
	157.25	92.92
	44.93	116.15
	179.71	69.69
	112.32	139.38
	134.78	46.46
	67.39	116.15
	89.86	69.69
	67.39	92.92
	134.78	69.69
	112.32	92.92
	134.78	139.38
	67.39	162.61
	112.32	92.92
	157.25	69.69
	89.86	92.92
		116.15
		69.69
		139.38
		139.38
		92.92
		92.92
		116.15
		69.69
		92.92
		116.15
		162.61
		69.69
		92.92
		185.84
		116.15
		139.38
		116.15
		92.92
		69.69
		116.15
		116.15
		139.38
		162.61
		69.69
		116.15
		116.15
		46.46
		162.61
		69.69
		92.92
		46.46
		185.84
		116.15
		139.38
		69.69
		92.92
		116.15
		46.46
		92.92
		116.15
		92.92
		116.15
		92.92
		116.15
		69.69
		116.15
		92.92
		92.92
		139.38
		92.92
		69.69
		92.92
		92.92
		116.15
		69.69
		69.69
		162.61
		139.38
		69.69
		69.69
		139.38
		69.69
		116.15

## Sheet: Figure 6 C
Figure 6 C
RAW DATA	control	Nes-cre;Vegfr2lox/-
	175.7	189.5
	83.6	249.7
	124.3	139.1		Table Analyzed	Branch length (% of control)
	92.5	137
	22.8	76.5		Column C	Nes-cre;Vegfr2lox/-
	161.2	152.4		vs.	vs.
	129.2	132.9		Column A	control
	133.1	124.1
	100.5	97.4		Unpaired t test
	147.6	208.8		P value	< 0.0001
	85.3	23.3		P value summary	****
	41.3	199.3		Significantly different? (P < 0.05)	Yes
	124.4	50.8		One- or two-tailed P value?	Two-tailed
	100.2	119.3		t, df	t=5.812 df=359
	38.8	170.9
	85.5	138.6		How big is the difference?
	37.6	98		Mean ± SEM of column A	100.0 ± 3.575, n=149
	116.3	221.1		Mean ± SEM of column C	137.4 ± 4.765, n=212
	198.5	142.9		Difference between means	37.35 ± 6.427
	107.1	97		95% confidence interval	24.71 to 49.99
	97	78.5		R squared	0.08599
	135.9	82.6
	87.5	84.4		F test to compare variances
	50.5	113.6		F,DFn, Dfd	2.527, 211, 148
	104.6	55.4		P value	< 0.0001
	157.3	46.5		P value summary	****
	52.7	104.6		Significantly different? (P < 0.05)	Yes
	92.1	79.3
	51	130.9
	110.3	57
	158.1	143.7
	125.5	130.8
	204	72.9
	95.1	90.5
	34.3	136.2
	124.2	162.9
	89.8	196.6
	41.3	137.3
	63.9	55
	62.6	274.5
	48.2	211.1
	89.6	93.8
	56.4	168.3
	129.9	150.6
	132.6	156
	155.6	87.5
	167.8	34
	169.5	113
	217.5	68.2
	185	33.1
	92.4	151.1
	139	30.8
	114.8	41.2
	94.6	47.8
	90.9	21.8
	99.6	129.9
	64.6	157.8
	57.5	261.7
	146.7	81.6
	116.1	48.9
	130.2	297.8
	249.6	177.3
	142.5	247.6
	57.6	115.1
	54.4	93.9
	54	109.1
	95.6	248.6
	138.2	179.9
	130.8	155.4
	19.5	218.7
	14.9	138.6
	60.5	181.4
	26	170.3
	53.8	360.8
	60.8	281.9
	84.7	194.8
	84.6	106
	35	228.1
	67.1	112.3
	28.7	219.8
	43.77	74.9
	75.52	173.4
	30.82	256
	134.09	287.2
	108.81	346.4
	85.69	174.9
	101.72	214.3
	56.72	201.3
	58.26	294.1
	143.33	283.7
	64.11	140.4
	72.74	129.2
	117.75	131.2
	117.75	184.8
	104.19	226.3
	130.08	331.2
	103.26	193.3
	129.46	249.7
	63.5	243.3
	137.17	79.6
	157.82	89.3
	104.19	95
	100.79	102.2
	109.12	289.5
	147.03	252.5
	85.07	255.3
	114.97	139.3
	103.26	185.1
	79.22	119.8
	123.91	156.4
	62.57	110
	153.2	111.4
	113.43	66.7
	105.42	141.9
	97.1	116.3
	93.4	56.8
	62.57	149.1
	108.19	240.1
	166.76	260
	65.75	77.4
	67.24	217.4
	135.38	201.9
	60.37	79.6
	123.43	130.6
	144.05	140.1
	123.43	217.3
	38.25	293.3
	68.14	125
	86.67	317.9
	150.02	98.9
	94.74	44.9
	64.25	70.3
	104.6	135.5
	80.09	122.7
	152.71	82.55
	51.7	94.68
	153.91	45.82
	105.2	137.17
	95.33	62.21
	37.06	121.69
	124.92	167.52
	40.94	107.73
	95.04	37.63
	124.62	120.48
	186.78	165.7
	92.64	186.94
	94.74	154.47
	120.44	49.47
	50.8	80.72
		193.31
		63.12
		159.02
		173.28
		159.63
		81.03
		127.76
		112.89
		172.07
		97.72
		108.34
		55.84
		96.81
		214.25
		181.48
		72.83
		88.31
		78.3
		89.22
		84.06
		124.42
		128.67
		203.02
		90.44
		71.92
		161.45
		44.61
		123.82
		85.28
		145.97
		39.45
		138.99
		116.23
		92.26
		114.11
		52.8
		104.7
		72.83
		186.94
		161.45
		86.19
		128.37
		101.97
		183.91
		74.96
		118.96
		103.18
		72.23
		147.79
		105.61
		65.25
		138.38
		69.19
		125.64
		71.01
		66.16
		80.12
		170.55
		128.67
		77.69
		120.18
		50.68
		196.35

## Sheet: Figure 6 D
Figure 6 D
RAW DATA	control	Nes-cre;Vegfr2lox/-
	4.1	123.709
	51.1	59.534		Table Analyzed	Net branch growth
	24.1	17.532
	42.1	41.143		Column C	Nes-cre;Vegfr2lox/-
	23.8	63.935		vs.	vs.
	40.8	103.794		Column A	control
	51.9	83.543
	-47	58.999		Unpaired t test
	69.7	79.31		P value	0.0196
	24.9	227.577		P value summary	*
	16.6	84.207		Significantly different? (P < 0.05)	Yes
	39.3	75.069		One- or two-tailed P value?	Two-tailed
	3.5	33.477		t, df	t=2.356 df=169
	110.1	91.415
	35.9	-25.214		How big is the difference?
	13.2	97.65		Mean ± SEM of column A	52.54 ± 5.529, n=110
	104.7	58.97		Mean ± SEM of column C	74.31 ± 7.394, n=61
	51.9	7.243		Difference between means	21.78 ± 9.244
	60.2	-3.234		95% confidence interval	3.530 to 40.03
	-12	163.93		R squared	0.0318
	107.3	23.67
	22.4	64.532		F test to compare variances
	215.4	57.838		F,DFn, Dfd	1.008, 109, 60
	21.3	113.755		P value	0.9886
	64.5	142.574		P value summary	ns
	46.8	93.275		Significantly different? (P < 0.05)	No
	34.4	56.998
	25.2	46.515
	-100.5	63.273
	38.4	93.541
	87.2	91.745
	76	97.383
	38.6	56.121
	108.9	144.914
	88.5	204.928
	122.3	44.824
	56.8	98.127
	29.5	12.807
	-6.3	76.695
	-51.8	93.502
	140.5	69.692
	50.8	68.72
	56.4	78.341
	25.2	142.516
	41.1	16.313
	97.8	130.533
	97.6	76.863
	69.3	-15.344
	46.7	-50.259
	107.2	187.236
	18.7	60.117
	12.6	-18.302
	124.8	-3.27
	6.5	95.472
	58.3	69.585
	111.6	21.209
	129.2	167.886
	72.3	207.283
	1.6	55.447
	58.3	17.393
	84.1	36.173
	58.6
	95.8
	6.2
	79.4
	45.6
	-37.1
	18.8
	-10.4
	96.1
	43.6
	91.1
	20.7
	32.7
	69.9
	-176.8
	43.8
	27.9
	-3.8
	7.8
	26
	42.6
	13.4
	56
	12.3
	165.5
	63.3
	82.7
	37
	30.5
	6.8
	97.8
	-28.6
	44.2
	150.6
	75.1
	22.7
	140.7
	63.1
	30.5
	50
	72.1
	30.7
	105.3
	154.5
	31.9
	122.9
	128.2
	289.2
	7.8

## Sheet: Figure 6 E
Figure 6 E
RAW DATA	control	Nes-cre;Vegfr2lox/-
	0.00028	0.00859
	0.0035	0.00413		Table Analyzed	Net branch growth rate
	0.0017	0.00122
	0.0029	0.00286		Column C	Nes-cre;Vegfr2lox/-
	0.0017	0.00444		vs.	vs.
	0.0028	0.00721		Column A	control
	0.0036	0.0058
	-0.0033	0.0041		Unpaired t test
	0.0048	0.00551		P value	0.0188
	0.0017	0.0158		P value summary	*
	0.0012	0.00585		Significantly different? (P < 0.05)	Yes
	0.0027	0.00521		One- or two-tailed P value?	Two-tailed
	0.00024	0.00232		t, df	t=2.372 df=169
	0.0076	0.00635
	0.0025	-0.00175		How big is the difference?
	0.00092	0.00678		Mean ± SEM of column A	0.003642 ± 0.0003820, n=110
	0.0073	0.0041		Mean ± SEM of column C	0.005160 ± 0.0005134, n=61
	0.0036	0.0005		Difference between means	0.001518 ± 0.0006398
	0.0042	-0.00022		95% confidence interval	0.0002547 to 0.002781
	-0.00084	0.01138		R squared	0.03222
	0.0075	0.00164
	0.0016	0.00448		F test to compare variances
	0.015	0.00402		F,DFn, Dfd	1.002, 60, 109
	0.0015	0.0079		P value	0.977
	0.0045	0.0099		P value summary	ns
	0.0032	0.00648		Significantly different? (P < 0.05)	No
	0.0024	0.00396
	0.0017	0.00323
	-0.007	0.00439
	0.0027	0.0065
	0.0061	0.00637
	0.0053	0.00676
	0.0027	0.0039
	0.0076	0.01006
	0.0061	0.01423
	0.0085	0.00311
	0.0039	0.00681
	0.0021	0.00089
	-0.00044	0.00533
	-0.0036	0.00649
	0.0098	0.00484
	0.0035	0.00477
	0.0039	0.00544
	0.0017	0.0099
	0.0029	0.00113
	0.0068	0.00906
	0.0068	0.00534
	0.0048	-0.00107
	0.0032	-0.00349
	0.0074	0.013
	0.0013	0.00417
	0.00087	-0.00127
	0.0087	-0.00023
	0.00045	0.00663
	0.004	0.00483
	0.0077	0.00147
	0.009	0.01166
	0.005	0.01439
	0.00011	0.00385
	0.004	0.00121
	0.0058	0.00251
	0.0041
	0.0067
	0.00043
	0.0055
	0.0032
	-0.0026
	0.0013
	-0.00072
	0.0067
	0.003
	0.0063
	0.0014
	0.0023
	0.0049
	-0.012
	0.003
	0.0019
	-0.00026
	0.00054
	0.0018
	0.003
	0.00093
	0.0039
	0.00085
	0.011
	0.0044
	0.0057
	0.0026
	0.0021
	0.00047
	0.0068
	-0.002
	0.0031
	0.01
	0.0052
	0.0016
	0.0098
	0.0044
	0.0021
	0.0035
	0.005
	0.0021
	0.0073
	0.011
	0.0022
	0.0085
	0.0089
	0.02
	0.00054

## Sheet: Figure 6 F
Figure 6 F
RAW DATA	control	Nes-cre;Vegfr2lox/-
	8.39748	6.35843
	7.0373	4.19207		Table Analyzed	Actin patches in 2' per 10µm
	6.19943	0.676394
	3.57487	6.04771		Column C	Nes-cre;Vegfr2lox/-
	2.33582	2.42162		vs.	vs.
	5.79248	4.06252		Column A	control
	4.7378	2.82606
	3.34781	2.70485		Unpaired t test
	2.78715	4.46374		P value	0.8149
	5.32422	3.59628		P value summary	ns
	3.03447	5.75341		Significantly different? (P < 0.05)	No
	2.62695	4.20208		One- or two-tailed P value?	Two-tailed
		4.93381		t, df	t=0.2359 df=35
		5.99865
		2.98338		How big is the difference?
		4.41371		Mean ± SEM of column A	4.600 ± 0.5658, n=12
		3.80845		Mean ± SEM of column C	4.459 ± 0.3137, n=25
		6.40855		Difference between means	-0.1410 ± 0.5975
		6.46979		95% confidence interval	-1.354 to 1.072
		6.64391		R squared	0.001588
		4.34082
		6.27989		F test to compare variances
		2.69333		F,DFn, Dfd	1.561, 11, 24
		5.51698		P value	0.3486
		3.67087		P value summary	ns
				Significantly different? (P < 0.05)	No

## Sheet: Figure 6 G
Figure 6 G
RAW DATA	filopodia		protrusion
	control	Nes-cre;Vegfr2lox/-	control	Nes-cre;Vegfr2lox/-
	33.3333	25	66.6667	75		Table Analyzed	% of events - filopodia
	5.55556	68.1818	94.4444	31.8182
	45.4545	33.3333	54.5455	66.6667		Column C	Nes-cre;Vegfr2lox/-
	72.7273	12.5	27.2727	87.5		vs.	vs.
	34.2857	55.5556	65.7143	44.4444		Column A	control
	0	62.5	100	37.5
	13.9535	11.1111	86.0465	88.8889		Unpaired t test
	55.5556	75	44.4444	25		P value	0.0203
	26.8293	60	73.1707	40		P value summary	*
	39.4737	50	60.5263	50		Significantly different? (P < 0.05)	Yes
	11.7647	18.75	88.2353	81.25		One- or two-tailed P value?	Two-tailed
	16.6667	51.5151	83.3333	48.4849		t, df	t=2.406 df=45
	7.31707	29.6296	92.6829	70.3704
	22.2222	35.5556	77.7778	64.4444		How big is the difference?
	7.69231	40.7407	92.3077	59.2593		Mean ± SEM of column A	24.98 ± 3.844, n=22
	9.375	59.375	90.625	40.625		Mean ± SEM of column C	37.78 ± 3.669, n=25
	20	15.3846	80	84.6154		Difference between means	12.80 ± 5.320
	6.89655	34.7826	93.1034	65.2174		95% confidence interval	2.083 to 23.51
	23.2558	42.8571	76.7442	57.1429		R squared	0.1139
	39.3939	24.3243	60.6061	75.6757
	30	32.3529	70	67.6471		F test to compare variances
	27.7778	12.8205	72.2222	87.1795		F,DFn, Dfd	1.035, 24, 21
		32.4324		67.5676		P value	0.9434
		35.7143		64.2857		P value summary	ns
		25		75		Significantly different? (P < 0.05)	No
						Table Analyzed	% of events - protrusion
						Column C	Nes-cre;Vegfr2lox/-
						vs.	vs.
						Column A	control
						Unpaired t test
						P value	0.0203
						P value summary	*
						Significantly different? (P < 0.05)	Yes
						One- or two-tailed P value?	Two-tailed
						t, df	t=2.406 df=45
						How big is the difference?
						Mean ± SEM of column A	75.02 ± 3.844, n=22
						Mean ± SEM of column C	62.22 ± 3.669, n=25
						Difference between means	-12.80 ± 5.320
						95% confidence interval	-23.51 to -2.083
						R squared	0.1139
						F test to compare variances
						F,DFn, Dfd	1.035, 24, 21
						P value	0.9434
						P value summary	ns
						Significantly different? (P < 0.05)	No

## Sheet: Figure 6 H
Figure 6 H
RAW DATA	control		Nes-cre;Vegfr2lox/-
	0-2µm	>2µm	0-2µm	>2µm
	66.6667	33.3333	75	25		Table Analyzed	Event distribution (% of total events) - 0-2µm
	94.4444	5.55556	50	50
	63.6364	36.3636	66.6667	33.3333		Column C	Nes-cre;Vegfr2lox/-
			87.5	12.5		vs.	vs.
	54.5455	45.4545	44.4444	55.5556		Column A	control
	74.2857	25.7143	50	50
	100	0	88.8889	11.1111		Unpaired t test
	88.3721	11.6279	25	75		P value	0.004
	61.1111	38.8889	60	40		P value summary	**
	80.4878	19.5122	64.2857	35.7143		Significantly different? (P < 0.05)	Yes
	57.8947	42.1053	87.5	12.5		One- or two-tailed P value?	Two-tailed
	88.2353	11.7647	48.4849	51.5151		t, df	t=3.034 df=45
	96.6667	3.33333	88.8889	11.1111
	95.1219	4.87805	75.5556	24.4444		How big is the difference?
	80.5556	19.4444	66.6667	33.3333		Mean ± SEM of column A	81.73 ± 3.003, n=22
	100	0	62.5	37.5		Mean ± SEM of column C	67.51 ± 3.508, n=25
	93.75	6.25	74.359	25.641		Difference between means	-14.21 ± 4.683
	90	10	60.8696	39.1304		95% confidence interval	-23.64 to -4.778
	93.1034	6.89655	39.2857	60.7143		R squared	0.1699
	88.3721	11.6279	78.3784	21.6216
	81.8182	18.1818	67.6471	32.3529		F test to compare variances
	76.6667	23.3333	92.3077	7.69231		F,DFn, Dfd	1.551, 24, 21
	72.2222	27.7778	67.5676	32.4324		P value	0.3129
			78.5714	21.4286		P value summary	ns
			87.5	12.5		Significantly different? (P < 0.05)	No
						Table Analyzed	Event distribution (% of total events) - >2µm
						Column D	Nes-cre;Vegfr2lox/-
						vs.	vs.
						Column B	control
						Unpaired t test
						P value	0.004
						P value summary	**
						Significantly different? (P < 0.05)	Yes
						One- or two-tailed P value?	Two-tailed
						t, df	t=3.034 df=45
						How big is the difference?
						Mean ± SEM of column B	18.27 ± 3.003, n=22
						Mean ± SEM of column D	32.49 ± 3.508, n=25
						Difference between means	14.21 ± 4.683
						95% confidence interval	4.778 to 23.64
						R squared	0.1699
						F test to compare variances
						F,DFn, Dfd	1.551, 24, 21
						P value	0.3129
						P value summary	ns
						Significantly different? (P < 0.05)	No
